# Supplementary material for: Visible light mediated aerobic radical C–H phosphorization toward arylphosphonates
Source: Royal Society of Chemistry journal article supplement (doi:10.1039/c6qo00049e), 2016-01-01

## **Supporting Information**

### **Visible Light Mediated Aerobic Radical C-H Phosphorization toward Arylphosphonates**

Pan Peng, Long Peng, Guangyu Wang, Fangyu Wang, Yi Luo and Aiwèn Lei\*

aiwenlei@whu.edu.cn

# Table of Contents

|                                                                               |    |
|-------------------------------------------------------------------------------|----|
| General information -----                                                     | 3  |
| Experimental section -----                                                    | 3  |
| 1) General Procedure for Preparation of Benzothiazoles <sup>[1]</sup> -----   | 3  |
| 2) General Procedure for Preparation of Phosphine Oxides <sup>[2]</sup> ----- | 3  |
| 3) Mechanism Study-----                                                       | 4  |
| 4) Procedure and analytical data of compounds <b>3aa-3ah</b> -----            | 5  |
| References-----                                                               | 10 |
| NMR Spectra of Products -----                                                 | 11 |

## General information

All reactions were run under air atmosphere with a dry air balloon fitted on a Schlenk tube. Unless otherwise noted, materials were obtained from commercial suppliers and used without further purification. Thin layer chromatography (TLC) employed glass 0.25 mm silica gel plates. Flash chromatography columns were packed with 200-300 mesh silica gel. EPR spectra were recorded on a Bruker A-200 spectrometer. HPLC yields were recorded with a DIONEX P680 HPLC Pump. All new compounds were characterized by  $^1\text{H}$  NMR,  $^{13}\text{C}$  NMR and HRMS. High resolution mass spectra (HRMS) were measured with a Thermo Fisher Scientific LTQ FT Ultra. The known compounds were characterized by  $^1\text{H}$  NMR,  $^{13}\text{C}$  NMR.  $^1\text{H}$  and  $^{13}\text{C}$  NMR data were recorded with ADVANCE III 400 MHz spectrometers with tetramethylsilane as an internal standard. All chemical shifts ( $\delta$ ) were reported in ppm and coupling constants ( $J$ ) in Hz. All chemical shifts were reported relative to tetramethylsilane (0 ppm for  $^1\text{H}$ ), and  $\text{CDCl}_3$  (77.16 ppm for  $^{13}\text{C}$ ), respectively.

## Experimental section

### 1) General Procedure for Preparation of Benzothiazoles<sup>[1]</sup>

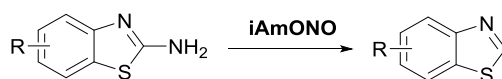

A 50 mL Schlenk tube was charged with 2-aminobenzothiazole derivative (6.5 mmol) and 10 mL of THF, and then isoamyl nitrite (14.3 mmol) was added slowly into the solution. The resultant mixture was refluxed for 30 minutes, and poured into ice-water, and the resultant aqueous mixture was extracted with ethyl acetate (3×30 mL). The organic extracts were combined and washed with brine, dried over  $\text{MgSO}_4$ , filtered, concentrated in vacuum and purified by column chromatography, giving the desired benzothiazoles in similar yields with the reported procedure.

### 2) General Procedure for Preparation of Phosphine Oxides<sup>[2]</sup>

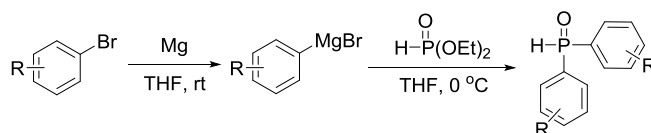

Phenylmagnesium bromide was prepared from aryl bromides (32.6 mmol) and magnesium (0.95 g, 39.6 mmol). Diethylphosphite (1.29 mL, 10.0 mmol) was added dropwisely to a solution of

phenylmagnesium bromide at 0 °C. The mixture was aged for 15 minutes at 0 °C, then stirred at ambient temperature for two hours. After that cooled again to 0 °C, and 75 mL NH<sub>4</sub>Cl aqueous was added slowly. The mixture was extracted with diethyl ether. Washed the organic phase with NaHCO<sub>3</sub> aqueous and brine, then dried over with Na<sub>2</sub>SO<sub>4</sub>. After the solvent was completely removed under vacuum, the residue was purified by column chromatography on silica gel using petroleum ether/ethyl acetate = 1/1 as eluent to give the product.

### 3) Mechanism Study

#### 3.1 Radical Trapping Experiment

Diphenylphosphine oxide **2a** (121.3 mg, 0.6 mmol), TEMPO (93.8mg, 0.6mmol) and Na<sub>2</sub>Eosin Y (4.2 mg, 0.006 mmol) was added to Schlenk tube equipped with a stir bar, a balloon filled with dry air was connected to the Schlenk tube through the side arm and purged one time. Then, benzothiazole **1a** (23.6 mg, 0.2 mmol), CHCl<sub>3</sub> (1.0 mL) was injected in the reaction tube with magnetic stirring. The reaction mixture was allowed to stir at room temperature under 23w white light for 16 h. The result was detected by HPLC.

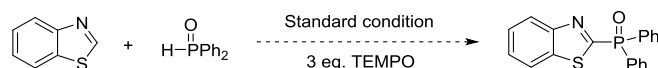

#### 3.2 “Light/dark” experiments over the time.

We determined the reaction yield at different time with or without visible light at the standard condition. The yield was determined by <sup>31</sup>P NMR analysis using OPPh<sub>3</sub> as internal standard.

Table 1 “Light/dark” experiments over the time.

| Time / h  | 0 | 4  | 6  | 10 | 12 | 16 |
|-----------|---|----|----|----|----|----|
| Yield / % | 0 | 12 | 12 | 34 | 34 | 55 |

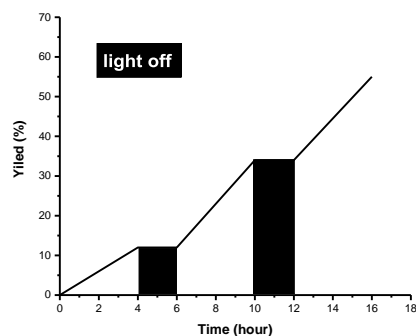

Fig. 1 “Light/dark” experiments over the time.

### 3.3 General Procedure for the Electron Paramagnetic Resonance (EPR) Experiment

**Typical procedure:** Diphenylphosphine oxide **2a** (121.3 mg, 0.6 mmol) and Na<sub>2</sub>Eosin Y (4.2 mg, 0.006 mmol) was added to Schlenk tube equipped with a stir bar, a balloon filled with dry air was connected to the Schlenk tube through the side arm and purged one time. CHCl<sub>3</sub> (1.0 mL) was injected in the reaction tube with magnetic stirring. The reaction mixture was allowed to stir at room temperature under 23 w white light for 1 h, followed by the addition of 10 ul DMPO and stir at room temperature under 23 w white light for 5 min. Then, this reaction was taken out by capillary and was analyzed by EPR at room temperature. This result was shown in Figure 2.

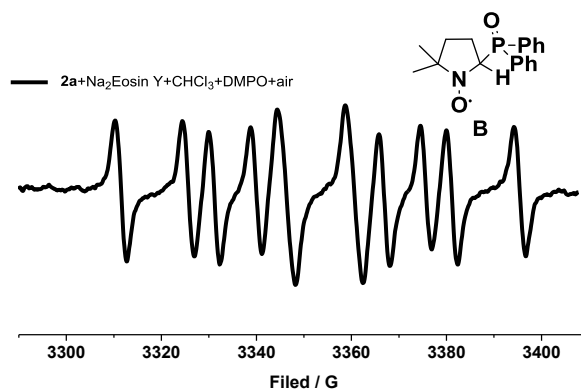

Fig. 2 The electron paramagnetic resonance (EPR) spectra (X band, 9.4 GHz, room temperature)

#### 4) Procedure and analytical data of compounds 3aa-3ah

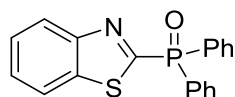

**Benzo[d]thiazol-2-ylidiphosphine oxide (3aa):**<sup>[3]</sup> Typical procedure: Diphenylphosphine oxide **2a** (121.3 mg, 0.6 mmol) and Na<sub>2</sub>Eosin Y (4.2 mg, 0.006 mmol) was added to Schlenk tube equipped with a stir bar, a balloon filled with dry air was connected to the Schlenk tube through the side arm and purged one time. Then, benzothiazole **1a** (23.6 mg, 0.2 mmol), CHCl<sub>3</sub> (1.0 mL) was injected in the reaction tube with magnetic stirring. The reaction mixture was allowed to stir at room temperature under 23w white light for 16 h. Thereafter, the reaction organic layers were concentrated under reduced pressure. The residue was separated on a silica gel column with petroleum ether (60-90 °C), ethyl acetate (2:1) as eluent to afford the desired product. <sup>1</sup>H NMR (400 MHz, CDCl<sub>3</sub>) δ 8.19 (d, *J* = 8.2 Hz, 1H), 8.00-7.95

(m, 5H), 7.57-7.49 (m, 8H).  $^{13}\text{C}$  NMR (101 MHz,  $\text{CDCl}_3$ )  $\delta$  166.8 (d,  $J_{\text{C-P}} = 127.5$  Hz), 155.4 (d,  $J_{\text{C-P}} = 21.5$  Hz), 136.8, 132.7 (d,  $J_{\text{C-P}} = 2.8$  Hz), 132.0 (d,  $J_{\text{C-P}} = 10.2$  Hz), 131.0 (d,  $J_{\text{C-P}} = 108.9$  Hz), 128.7 (d,  $J_{\text{C-P}} = 12.8$  Hz), 126.8, 126.7, 124.8, 122.2.  $^{31}\text{P}$  NMR (162 MHz,  $\text{CDCl}_3$ )  $\delta$  20.11.

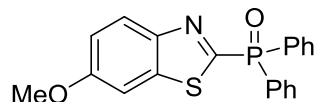

**(6-Methoxybenzo[d]thiazol-2-yl)diphenylphosphine oxide (3ba):**<sup>[3]</sup> The synthesis procedure is the same as for **3aa**.  $^1\text{H}$  NMR (400 MHz,  $\text{CDCl}_3$ )  $\delta$  8.07-8.05 (m, 1H), 7.98-7.93 (m, 4H), 7.57 (t,  $J = 7.4$  Hz, 2H), 7.52-7.48 (m, 4H), 7.42 (s, 1H), 7.16-7.14 (m, 1H), 3.90 (d,  $J = 1.4$  Hz, 3H).  $^{13}\text{C}$  NMR (101 MHz,  $\text{CDCl}_3$ )  $\delta$  163.4 (d,  $J_{\text{C-P}} = 130.5$  Hz), 159.0, 150.3 (d,  $J_{\text{C-P}} = 22.0$  Hz), 138.8, 132.7 (d,  $J_{\text{C-P}} = 2.8$  Hz), 132.0 (d,  $J_{\text{C-P}} = 10.2$  Hz), 131.3 (d,  $J_{\text{C-P}} = 108.9$  Hz), 128.8 (d,  $J_{\text{C-P}} = 12.8$  Hz), 125.4, 117.3, 103.5, 56.0.  $^{31}\text{P}$  NMR (162 MHz,  $\text{CDCl}_3$ )  $\delta$  20.00.

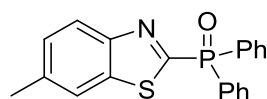

**(6-Methylbenzo[d]thiazol-2-yl)diphenylphosphine oxide (3ca):**<sup>[3]</sup> The synthesis procedure is the same as for **3aa**.  $^1\text{H}$  NMR (400 MHz,  $\text{CDCl}_3$ )  $\delta$  8.06 (d,  $J = 8.5$  Hz, 1H), 7.98 – 7.93 (m, 4H), 7.79 (s, 1H), 7.58 – 7.54 (m, 2H), 7.51 – 7.46 (m, 4H), 7.35 (dd,  $J = 8.5, 1.3$  Hz, 1H), 2.50 (s, 3H).  $^{13}\text{C}$  NMR (101 MHz,  $\text{CDCl}_3$ )  $\delta$  165.3 (d,  $J_{\text{C-P}} = 128.4$  Hz), 153.7 (d,  $J_{\text{C-P}} = 21.7$  Hz), 137.2, 137.2, 132.7 (d,  $J_{\text{C-P}} = 2.9$  Hz), 132.0 (d,  $J_{\text{C-P}} = 10.2$  Hz), 131.2 (d,  $J_{\text{C-P}} = 108.9$  Hz), 128.7 (d,  $J_{\text{C-P}} = 12.8$  Hz), 128.6, 124.3, 121.7, 21.8.  $^{31}\text{P}$  NMR (162 MHz,  $\text{CDCl}_3$ )  $\delta$  20.18.

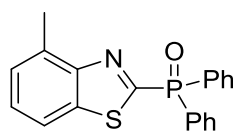

**(4-Methylbenzo[d]thiazol-2-yl)diphenylphosphine oxide (3da):**<sup>[4]</sup> The synthesis procedure is the same as for **3aa**.  $^1\text{H}$  NMR (400 MHz,  $\text{CDCl}_3$ )  $\delta$  8.00-7.98 (m, 4H), 7.80 (d,  $J = 7.8$  Hz, 1H), 7.57-7.53 (m, 2H), 7.53 – 7.49 (m, 4H), 7.38-7.31 (m, 2H), 2.77 (s, 3H).  $^{13}\text{C}$  NMR (101 MHz,  $\text{CDCl}_3$ )  $\delta$  164.9 (d,  $J_{\text{C-P}} = 129.0$  Hz), 155.0 (d,  $J_{\text{C-P}} = 21.1$  Hz), 136.7, 134.9, 132.6 (d,  $J_{\text{C-P}} = 2.8$  Hz), 131.9 (d,  $J_{\text{C-P}} = 10.2$  Hz), 130.8, 128.6 (d,  $J_{\text{C-P}} = 12.8$  Hz), 127.0, 126.7, 119.5, 18.5.  $^{31}\text{P}$  NMR (162 MHz,  $\text{CDCl}_3$ )  $\delta$  19.38.

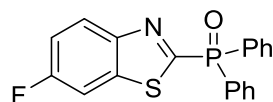

**(6-Fluorobenzo[d]thiazol-2-yl)diphenylphosphine oxide (3ea):**<sup>[3]</sup> The synthesis procedure is the same as for **3aa**. <sup>1</sup>H NMR (400 MHz, CDCl<sub>3</sub>) δ 8.14 (dd, *J* = 9.1, 4.8 Hz, 1H), 8.16 – 8.12 (m, 4H), 7.68 (dd, *J* = 8.0, 2.5 Hz, 1H), 7.61 – 7.57 (m, 2H), 7.53 – 7.49 (m, 4H), 7.32 – 7.27 (m, 1H). <sup>13</sup>C NMR (101 MHz, CDCl<sub>3</sub>) δ 166.8 (d, *J*<sub>C-P, C-F</sub> = 126.2, 3.6 Hz), 161.3 (d, *J*<sub>C-F</sub> = 248.9 Hz), 152.2 (d, *J* = 21.8 Hz), 138.1 (d, *J*<sub>C-F</sub> = 11.3 Hz), 132.8 (d, *J*<sub>C-P</sub> = 2.8 Hz), 132.0 (d, *J*<sub>C-P</sub> = 10.3 Hz), 130.8 (d, *J*<sub>C-P</sub> = 109.2 Hz), 128.8 (d, *J*<sub>C-P</sub> = 12.9 Hz), 126.0 (d, *J*<sub>C-F</sub> = 9.7 Hz), 116.0 (d, *J*<sub>C-F</sub> = 25.2 Hz), 108.1 (d, *J*<sub>C-F</sub> = 26.5 Hz). <sup>31</sup>P NMR (162 MHz, CDCl<sub>3</sub>) δ 19.93.

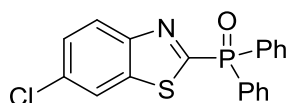

**(6-Chlorobenzo[d]thiazol-2-yl)diphenylphosphine oxide (3fa):**<sup>[5]</sup> The synthesis procedure is the same as for **3aa**. <sup>1</sup>H NMR (400 MHz, CDCl<sub>3</sub>) δ 8.09 (d, *J* = 8.8 Hz, 1H), 7.98 – 7.93 (m, 5H), 7.60-7.57 (m, 2H), 7.53 – 7.48 (m, 5H). <sup>13</sup>C NMR (101 MHz, CDCl<sub>3</sub>) δ 167.9 (d, *J*<sub>C-P</sub> = 125.1 Hz), 154.0 (d, *J*<sub>C-P</sub> = 21.6 Hz), 138.1, 133.0, 132.9 (d, *J*<sub>C-P</sub> = 2.9 Hz), 132.0 (d, *J*<sub>C-P</sub> = 10.3 Hz), 130.8 (d, *J*<sub>C-P</sub> = 109.2 Hz), 128.8 (d, *J*<sub>C-P</sub> = 12.9 Hz), 127.8, 125.6, 121.7. <sup>31</sup>P NMR (162 MHz, CDCl<sub>3</sub>) δ 19.89.

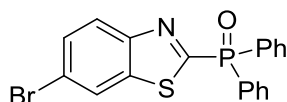

**(6-Bromo-1H-inden-2-yl)diphenylphosphine oxide (3ga):**<sup>[3]</sup> The synthesis procedure is the same as for **3aa**. <sup>1</sup>H NMR (400 MHz, CDCl<sub>3</sub>) δ 8.15 (d, *J* = 1.8 Hz, 1H), 8.02 (d, *J* = 8.8 Hz, 1H), 7.98-7.93 (m, 4H), 7.63 (dd, *J* = 8.8, 1.9 Hz, 1H), 7.60 – 7.56 (m, 2H), 7.65 – 7.56 (m, 3H), 7.53 – 7.48 (m, 4H). <sup>13</sup>C NMR (101 MHz, CDCl<sub>3</sub>) δ 167.8 (d, *J*<sub>C-P</sub> = 124.9 Hz), 154.3 (d, *J*<sub>C-P</sub> = 21.5 Hz), 138.5, 132.9 (d, *J*<sub>C-P</sub> = 2.9 Hz), 132.0 (d, *J*<sub>C-P</sub> = 10.3 Hz), 130.7 (d, *J*<sub>C-P</sub> = 109.2 Hz), 130.4, 128.82 (d, *J*<sub>C-P</sub> = 12.9 Hz), 125.9, 124.7, 120.9. <sup>31</sup>P NMR (162 MHz, CDCl<sub>3</sub>) δ 19.98.

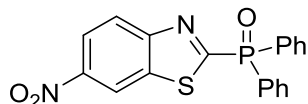

**(6-Nitrobenzo[d]thiazol-2-yl)diphenylphosphine oxide (3ha):**<sup>[4]</sup> The synthesis procedure is the same as for **3aa**. <sup>1</sup>H NMR (400 MHz, DMSO) δ 9.34 (d, *J* = 1.0 Hz, 1H), 8.42 – 8.37 (m, 2H), 7.88 (dd, *J* = 12.6, 7.4 Hz, 4H), 7.70 (t, *J* = 7.1 Hz, 2H), 7.72 – 7.59 (m, 4H). <sup>13</sup>C NMR (101 MHz, DMSO) δ 174.5 (d, *J*<sub>C-P</sub> = 118.2 Hz), 157.9 (d, *J*<sub>C-P</sub> = 20.8 Hz), 145.5, 136.7, 133.3 (d, *J*<sub>C-P</sub> = 2.7 Hz), 131.5 (d, *J*<sub>C-P</sub> =

10.3 Hz), 130.1 (d,  $J_{C-P} = 108.1$  Hz), 129.2 (d,  $J_{C-P} = 12.6$  Hz), 125.1, 122.3, 120.4.  $^{31}\text{P}$  NMR (162 MHz, DMSO)  $\delta$  18.49.

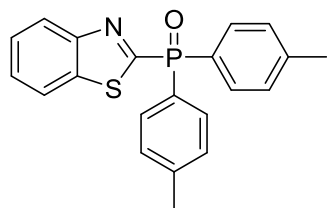

**Benzo[d]thiazol-2-yl-di-p-tolylphosphine oxide (3ab):**<sup>[3]</sup> The synthesis procedure is the same as for **3aa**.

$^1\text{H}$  NMR (400 MHz,  $\text{CDCl}_3$ )  $\delta$  8.18 (d,  $J = 8.1$  Hz, 1H), 8.00 (d,  $J = 7.8$  Hz, 1H), 7.83 (dd,  $J = 12.5, 8.1$  Hz, 4H), 7.55-7.45 (m, 2H), 7.31-7.27 (m, 4H), 2.39 (s, 6H).  $^{13}\text{C}$  NMR (101 MHz,  $\text{CDCl}_3$ )  $\delta$  167.5 (d,  $J_{C-P} = 126.2$  Hz), 155.4 (d,  $J_{C-P} = 21.4$  Hz), 143.3 (d,  $J_{C-P} = 2.9$  Hz), 136.9, 132.1 (d,  $J_{C-P} = 10.6$  Hz), 129.5 (d,  $J_{C-P} = 13.2$  Hz), 127.8 (d,  $J_{C-P} = 111.6$  Hz), 126.6 (d,  $J_{C-P} = 7.6$  Hz), 124.8, 122.2, 21.8.  $^{31}\text{P}$  NMR (162 MHz,  $\text{CDCl}_3$ )  $\delta$  20.93.

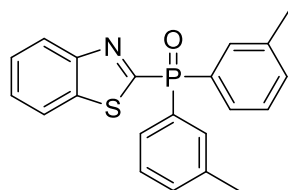

**Benzo[d]thiazol-2-yl-di-m-tolylphosphine oxide (3ac):**<sup>[4]</sup> The synthesis procedure is the same as for

**3aa**.  $^1\text{H}$  NMR (400 MHz,  $\text{CDCl}_3$ )  $\delta$  8.20 (d,  $J = 7.9$  Hz, 1H), 8.01 – 7.99 (m, 1H), 7.79 (d,  $J = 13.0$  Hz, 1H), 7.76 – 7.71 (m, 4H), 7.56-7.46 (m, 2H), 7.40-7.36 (m, 4H), 2.37 (s, 6H).  $^{13}\text{C}$  NMR (101 MHz,  $\text{CDCl}_3$ )  $\delta$  167.2 (d,  $J_{C-P} = 126.0$  Hz), 155.5 (d,  $J_{C-P} = 21.4$  Hz), 138.7 (d,  $J_{C-P} = 12.7$  Hz), 136.9, 133.6 (d,  $J_{C-P} = 2.9$  Hz), 132.3 (d,  $J_{C-P} = 10.0$  Hz), 130.8 (d,  $J_{C-P} = 108.4$  Hz), 129.2 (d,  $J_{C-P} = 10.5$  Hz), 128.6 (d,  $J_{C-P} = 13.6$  Hz), 126.7, 126.6, 124.8, 122.2, 21.5.  $^{31}\text{P}$  NMR (162 MHz,  $\text{CDCl}_3$ )  $\delta$  20.69.

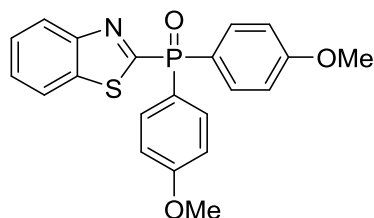

**Benzo[d]thiazol-2-yl-bis(4-methoxyphenyl)phosphine oxide (3ad):**<sup>[4]</sup> The synthesis procedure is the

same as for **3aa**.  $^1\text{H}$  NMR (400 MHz,  $\text{CDCl}_3$ )  $\delta$  8.17 (d,  $J = 7.8$  Hz, 1H), 8.01 – 7.99 (m, 1H), 7.89 – 7.82 (m, 4H), 7.55-7.46 (m, 2H), 7.00 – 6.98 (m, 4H), 3.83 (s, 6H).  $^{13}\text{C}$  NMR (101 MHz,  $\text{CDCl}_3$ )  $\delta$  167.9 (d,



$J_{C-P} = 127.0$  Hz), 163.1 (d,  $J_{C-P} = 2.9$  Hz), 155.4 (d,  $J_{C-P} = 21.3$  Hz), 136.9, 134.0 (d,  $J_{C-P} = 11.7$  Hz), 126.6 (d,  $J_{C-P} = 10.0$  Hz), 124.8, 122.3 (d,  $J_{C-P} = 116.3$  Hz), 122.2, 114.3 (d,  $J_{C-P} = 13.9$  Hz), 55.5.  $^{31}\text{P}$  NMR (162 MHz,  $\text{CDCl}_3$ )  $\delta$  20.74.

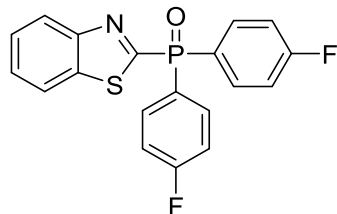

**Benzo[d]thiazol-2-ylbis(4-fluorophenyl)phosphine oxide (3ae):**<sup>[3]</sup> The synthesis procedure is the same as for **3aa**.  $^1\text{H}$  NMR (400 MHz,  $\text{CDCl}_3$ )  $\delta$  8.20 (d,  $J = 7.8$  Hz, 1H), 8.05 – 8.02 (m, 1H), 8.01 – 7.94 (m, 4H), 7.60 – 7.50 (m, 2H), 7.20 (td,  $J = 8.7, 2.4$  Hz, 4H).  $^{13}\text{C}$  NMR (101 MHz,  $\text{CDCl}_3$ )  $\delta$  165.7 (dd,  $J_{C-P, C-F} = 255.2, 3.1$  Hz), 165.1 (dd,  $J_{C-P} = 119.9$  Hz), 155.4 (d,  $J_{C-P} = 21.9$  Hz), 136.9, 134.6 (dd,  $J_{C-P, C-F} = 11.8, 9.0$  Hz), 127.0, 126.9 (dd,  $J_{C-P, C-F} = 113.0, 3.3$  Hz), 124.9, 122.3, 116.4 (dd,  $J_{C-P, C-F} = 21.6, 14.1$  Hz).  $^{31}\text{P}$  NMR (162 MHz,  $\text{CDCl}_3$ )  $\delta$  18.53.

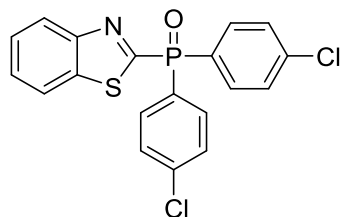

**Benzo[d]thiazol-2-ylbis(4-chlorophenyl)phosphine oxide (3af):** The synthesis procedure is the same as for **3aa**.  $^1\text{H}$  NMR (400 MHz,  $\text{CDCl}_3$ )  $\delta$  8.19 (d,  $J = 8.0$  Hz, 1H), 8.02 (d,  $J = 7.8$  Hz, 1H), 7.94 – 7.88 (m, 8.5 Hz, 4H), 7.58 – 7.47 (m, 6H).  $^{13}\text{C}$  NMR (101 MHz,  $\text{CDCl}_3$ )  $\delta$  165.6 (d,  $J_{C-P} = 130.7$  Hz), 155.3 (d,  $J_{C-P} = 22.0$  Hz), 139.6 (d,  $J_{C-P} = 3.5$  Hz), 136.7, 133.3 (d,  $J_{C-P} = 11.1$  Hz), 129.2 (d,  $J_{C-P} = 13.5$  Hz), 129.2 (d,  $J_{C-P} = 111.1$  Hz), 127.0, 124.8, 122.2.  $^{31}\text{P}$  NMR (162 MHz,  $\text{CDCl}_3$ )  $\delta$  18.40. HRMS (ESI+) calculated for  $\text{C}_{19}\text{H}_{13}\text{Cl}_2\text{NOPS}$  (M+H): 403.9827; found: 403.9825.

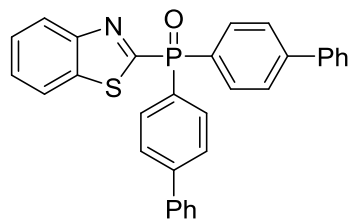

**Di([1,1'-biphenyl]-4-yl)(benzo[d]thiazol-2-yl)phosphine oxide (3ag):** The synthesis procedure is the same as for **3aa**. <sup>1</sup>H NMR (400 MHz, CDCl<sub>3</sub>) δ 8.22 (d, *J* = 8.1 Hz, 1H), 8.11 – 8.06 (m, 4H), 8.01 (d, *J* = 7.8 Hz, 1H), 7.74 – 7.71 (m, 4H), 7.59 – 7.35 (m, 12H). <sup>13</sup>C NMR (101 MHz, CDCl<sub>3</sub>) δ 167.0 (d, *J*<sub>C-P</sub> = 127.4 Hz), 155.4 (d, *J*<sub>C-P</sub> = 21.6 Hz), 145.5 (d, *J*<sub>C-P</sub> = 2.9 Hz), 139.8, 136.9, 132.5 (d, *J*<sub>C-P</sub> = 10.6 Hz), 129.5 (d, *J*<sub>C-P</sub> = 110.5 Hz), 129.0, 128.3, 127.5 (d, *J*<sub>C-P</sub> = 13.2 Hz), 127.4, 126.8, 126.7, 124.8, 122.2. <sup>31</sup>P NMR (162 MHz, CDCl<sub>3</sub>) δ 20.14. HRMS (ESI<sup>+</sup>) calculated for C<sub>31</sub>H<sub>23</sub>NOPS (M+H): 488.1232; found: 488.1226.

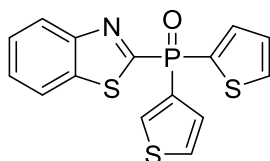

**Benzo[d]thiazol-2-yl-di(thiophen-2-yl)phosphine oxide (3ah):** The synthesis procedure is the same as for **3aa**. <sup>1</sup>H NMR (400 MHz, CDCl<sub>3</sub>) δ 8.21 (d, *J* = 8.1 Hz, 1H), 8.01 (d, *J* = 8.0 Hz, 1H), 7.84 – 7.80 (m, 4H), 7.58 – 7.48 (m, 2H), 7.23 – 7.21 (m, 2H). <sup>13</sup>C NMR (101 MHz, CDCl<sub>3</sub>) δ 166.3 (d, *J*<sub>C-P</sub> = 147.1 Hz), 155.0 (d, *J*<sub>C-P</sub> = 24.1 Hz), 137.8 (d, *J*<sub>C-P</sub> = 11.2 Hz), 136.8, 135.4 (d, *J*<sub>C-P</sub> = 5.8 Hz), 131.7 (d, *J*<sub>C-P</sub> = 128.5 Hz), 128.5 (d, *J*<sub>C-P</sub> = 15.5 Hz), 127.0, 126.9, 124.9, 122.2. <sup>31</sup>P NMR (162 MHz, CDCl<sub>3</sub>) δ 7.00. HRMS (ESI<sup>+</sup>) calculated for C<sub>15</sub>H<sub>11</sub>NOPS<sub>3</sub> (M+H): 347.9735; found: 347.9733.

## References

1. A. Tsuruoka, Y. Kaku, H. Kakinuma, I. Tsukada, M. Yanagisawa, K. Nara and T. Naito, *Chem. Pharm. Bull.*, 1998, **46**, 623-630.
2. C. A. Busacca, J. C. Lorenz, N. Grinberg, N. Haddad, M. Hrapchak, B. Latli, H. Lee, P. Sabila, A. Saha, M. Sarvestani, S. Shen, R. Varsolona, X. Wei and C. H. Senanayake, *Org. Lett.*, 2005, **7**, 4277-4280.
3. H.-J. Zhang, W. Lin, Z. Wu, W. Ruan and T.-B. Wen, *Chem. commun.*, 2015, **51**, 3450-3453.
4. K. Luo, Y.-Z. Chen, W.-C. Yang, J. Zhu and L. Wu, *Org. Lett.*, 2016, **18**, 452-455.
5. X.-L. Chen, X. Li, L.-B. Qu, Y.-C. Tang, W.-P. Mai, D.-H. Wei, W.-Z. Bi, L.-K. Duan, K. Sun, J.-Y. Chen, D.-D. Ke and Y.-F. Zhao, *J. Org. Chem.*, 2014, **79**, 8407-8416.

# NMR Spectra of Products

3aa

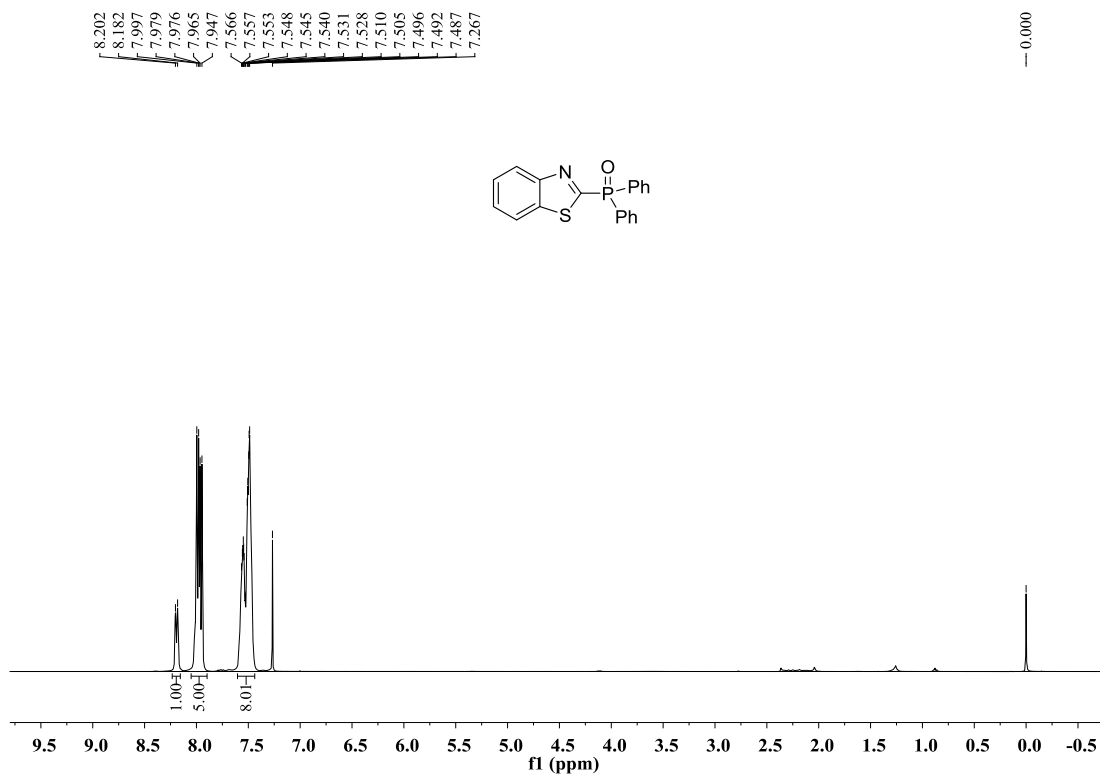

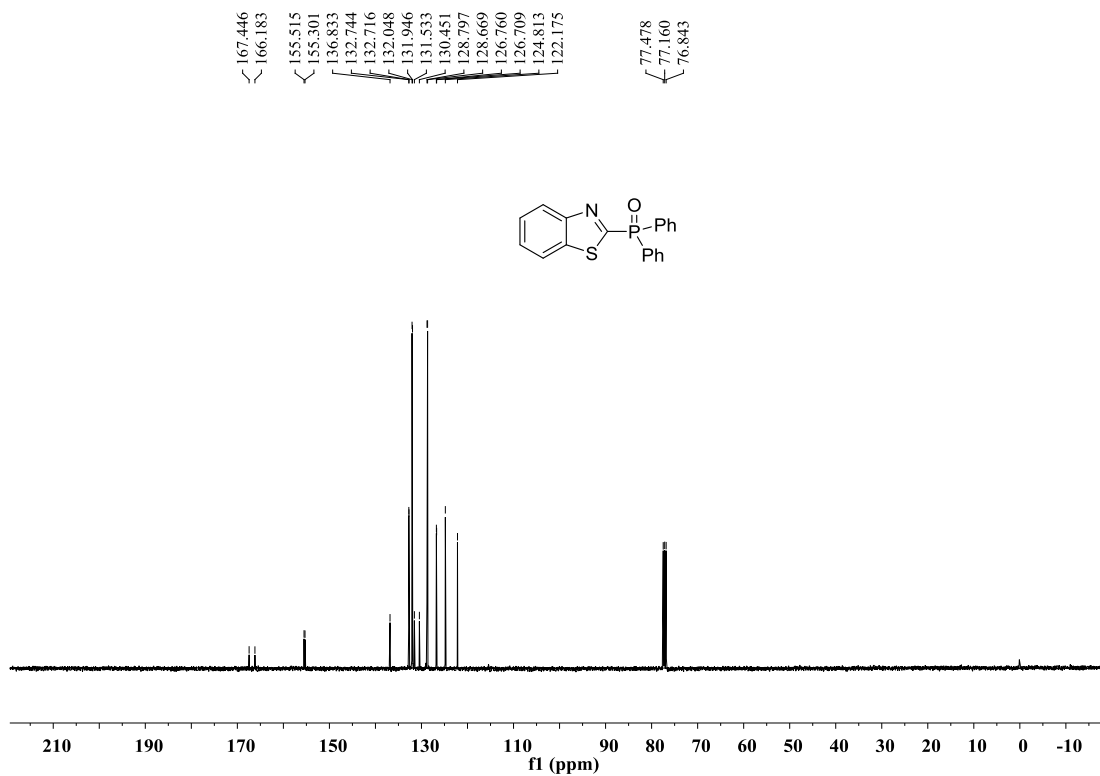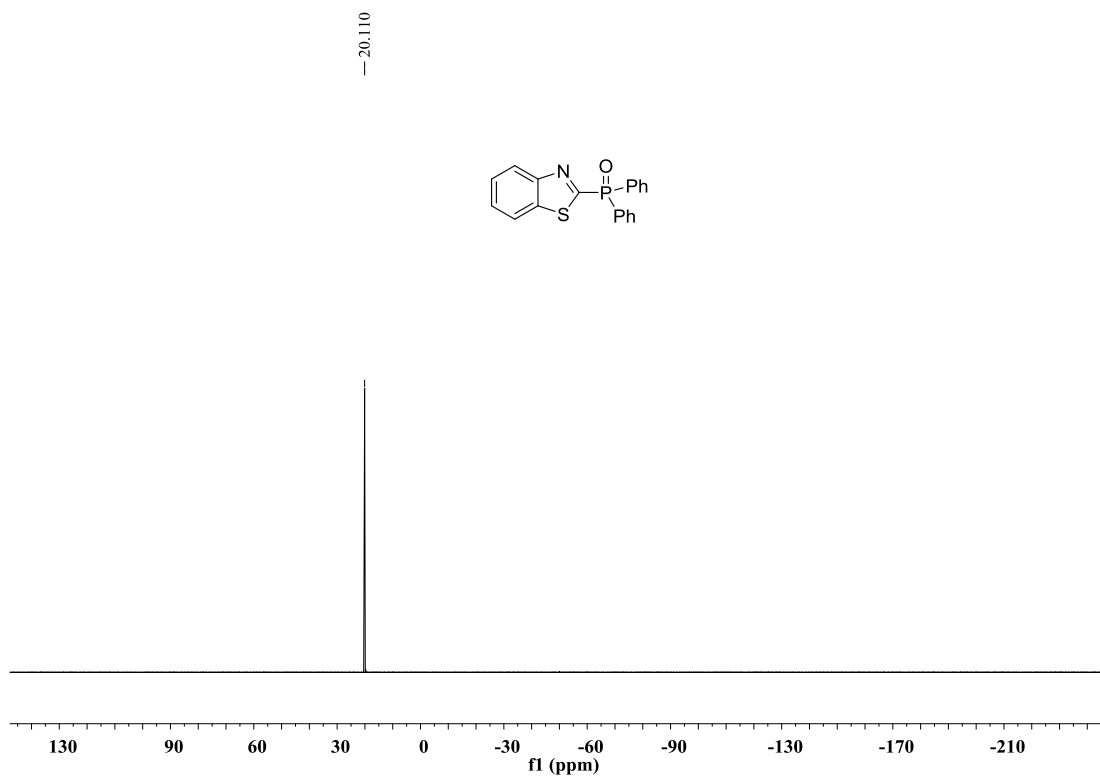

**3ba**

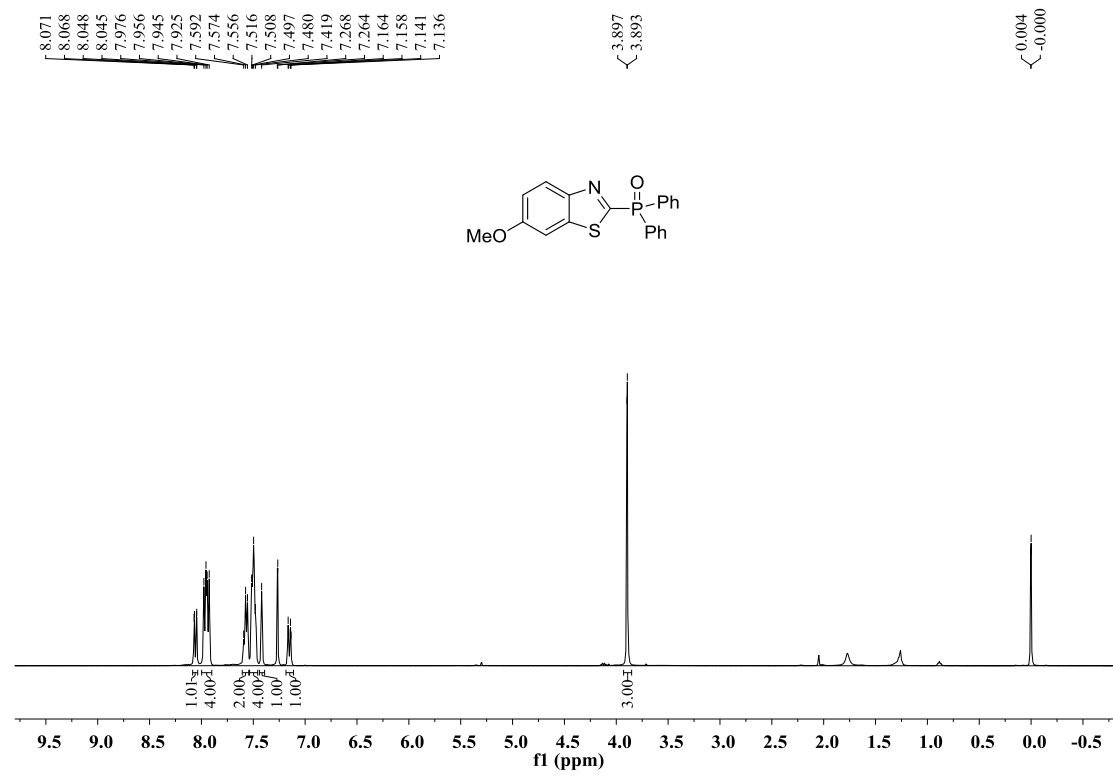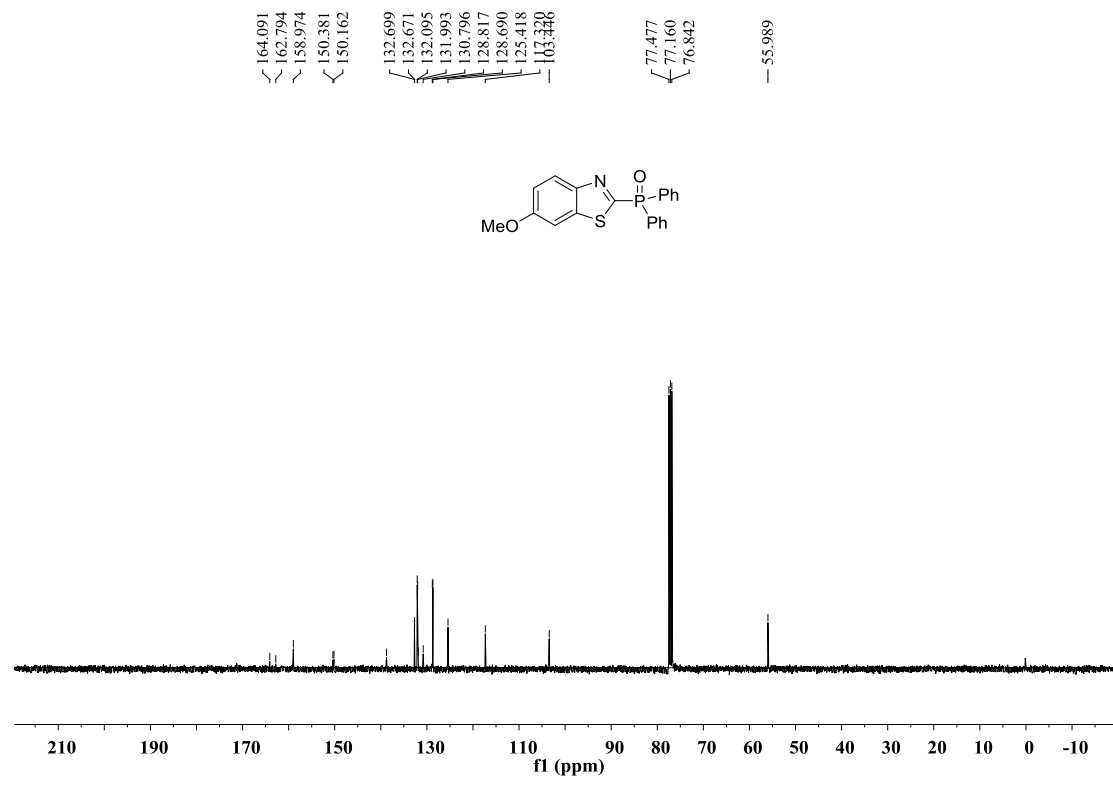

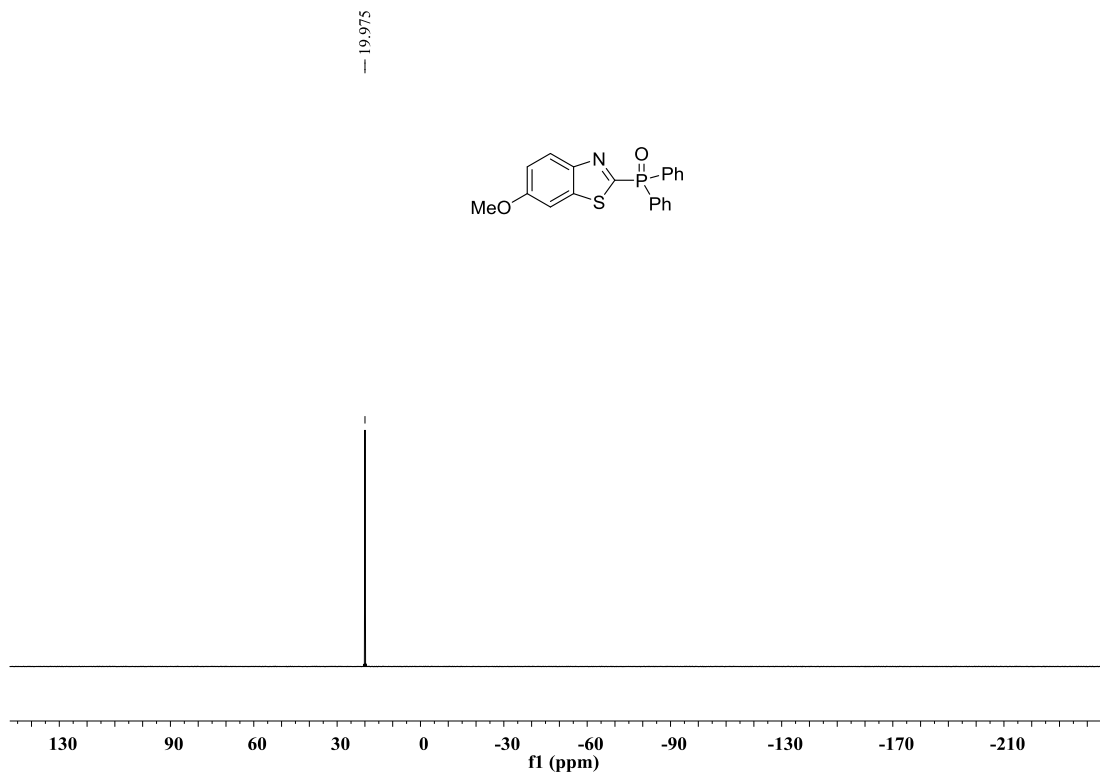

**3ca**

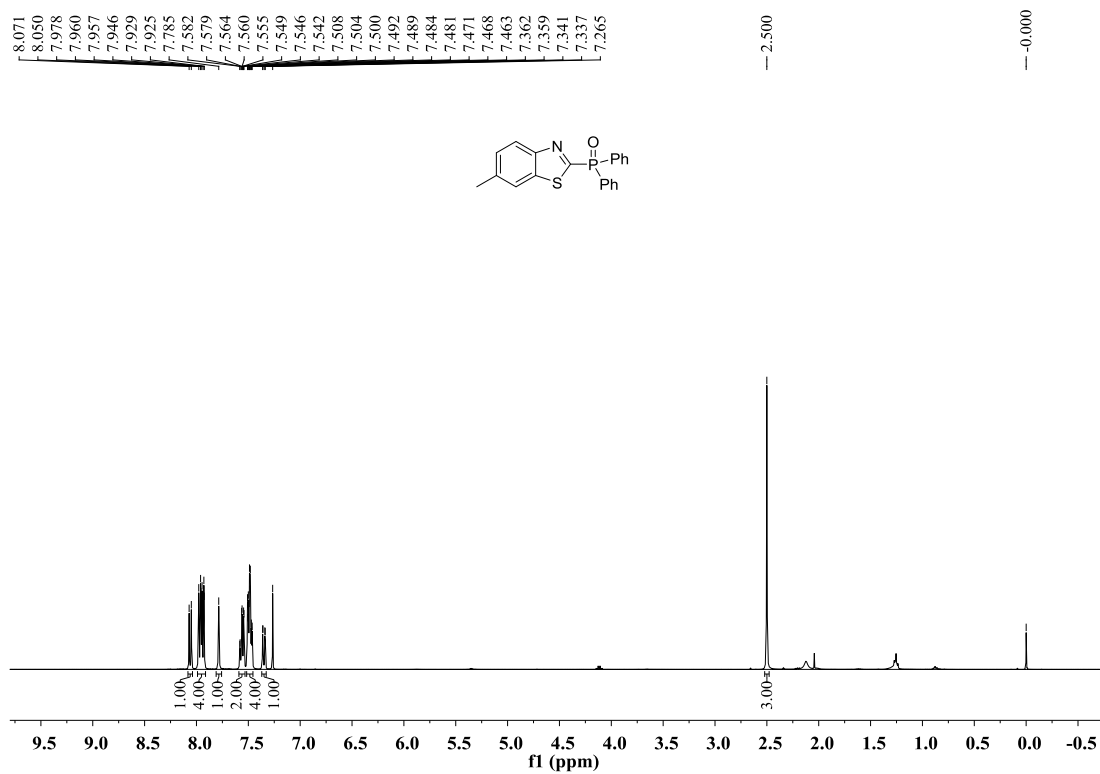

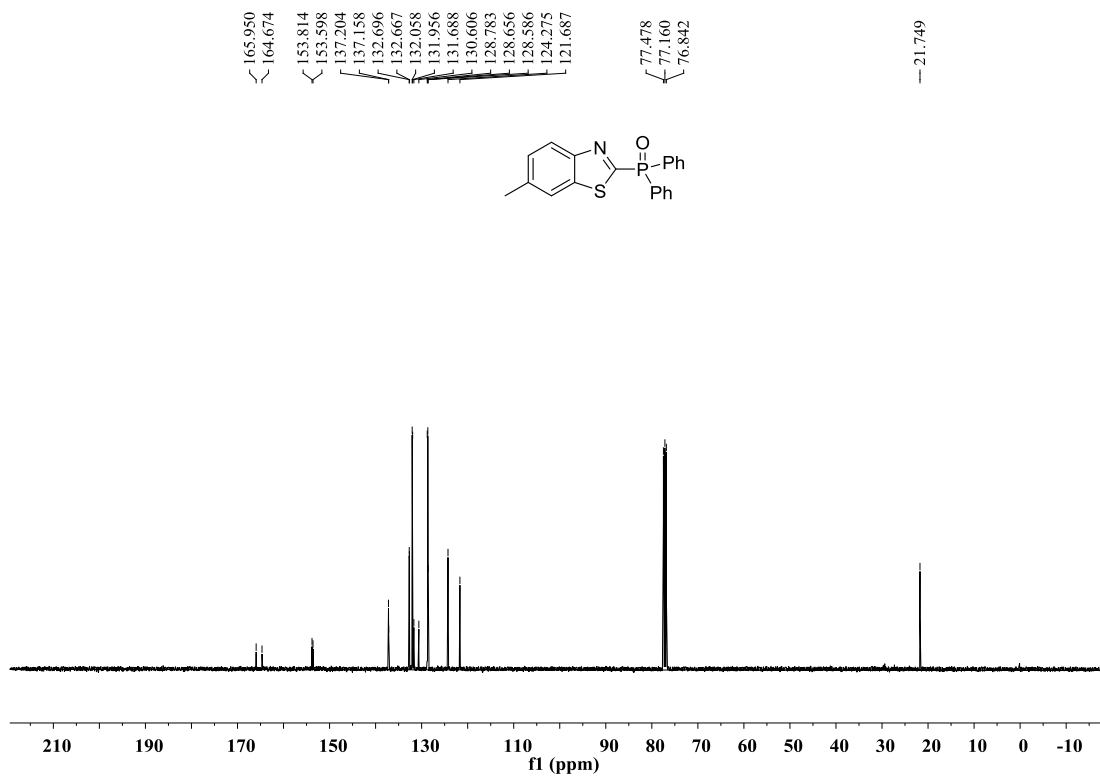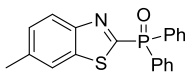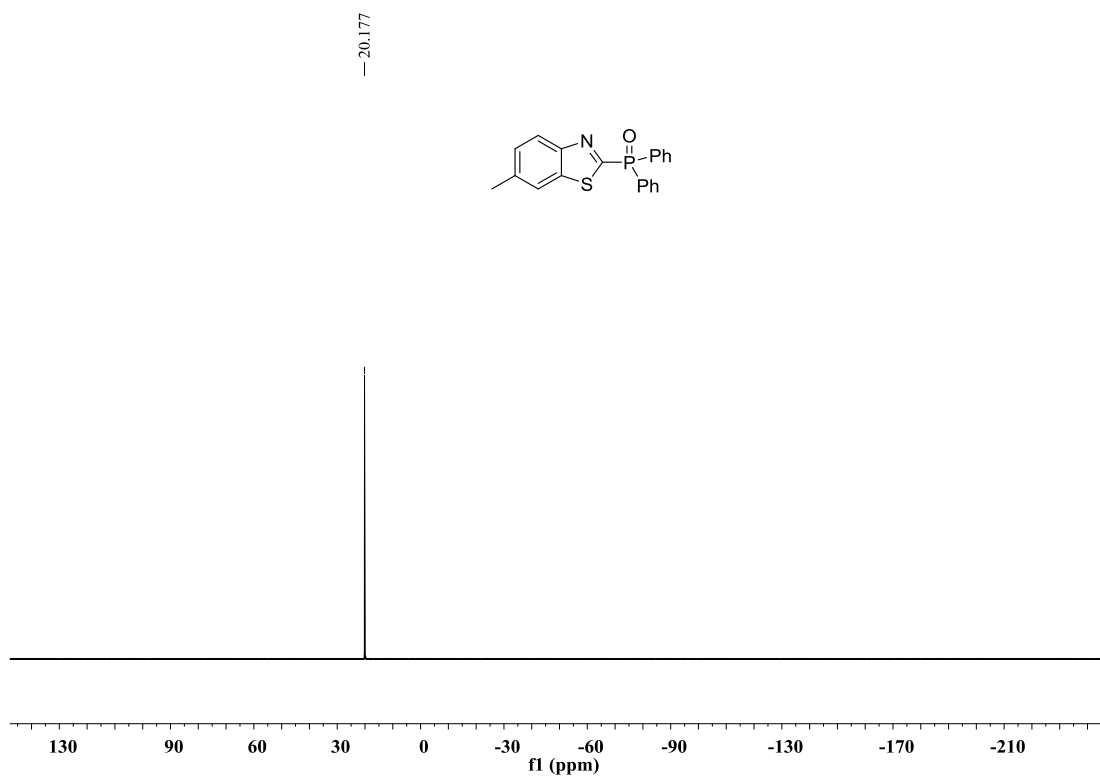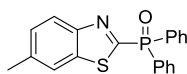

3da

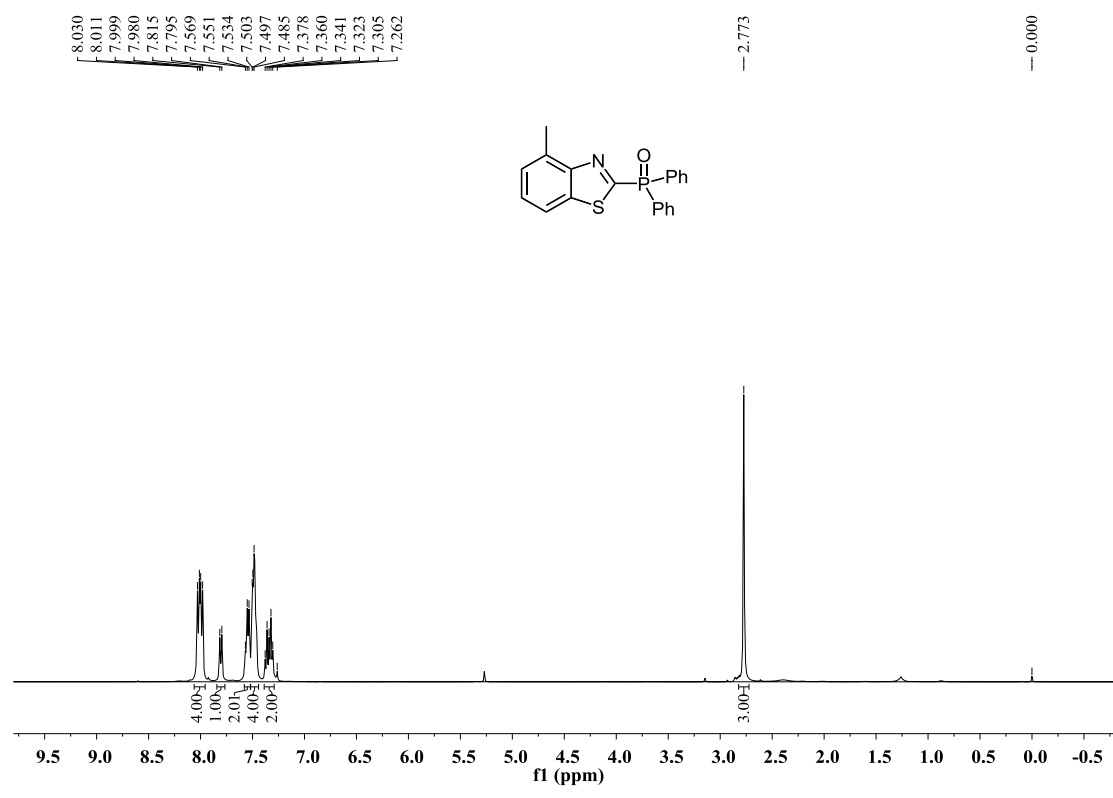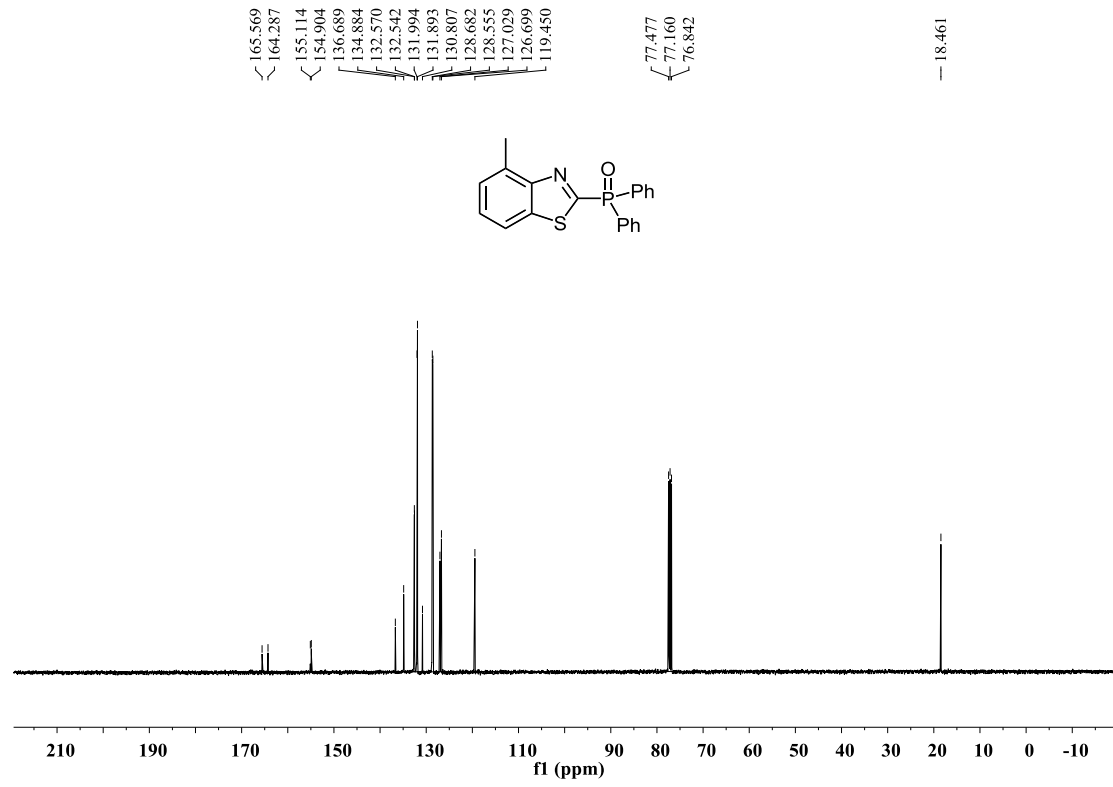



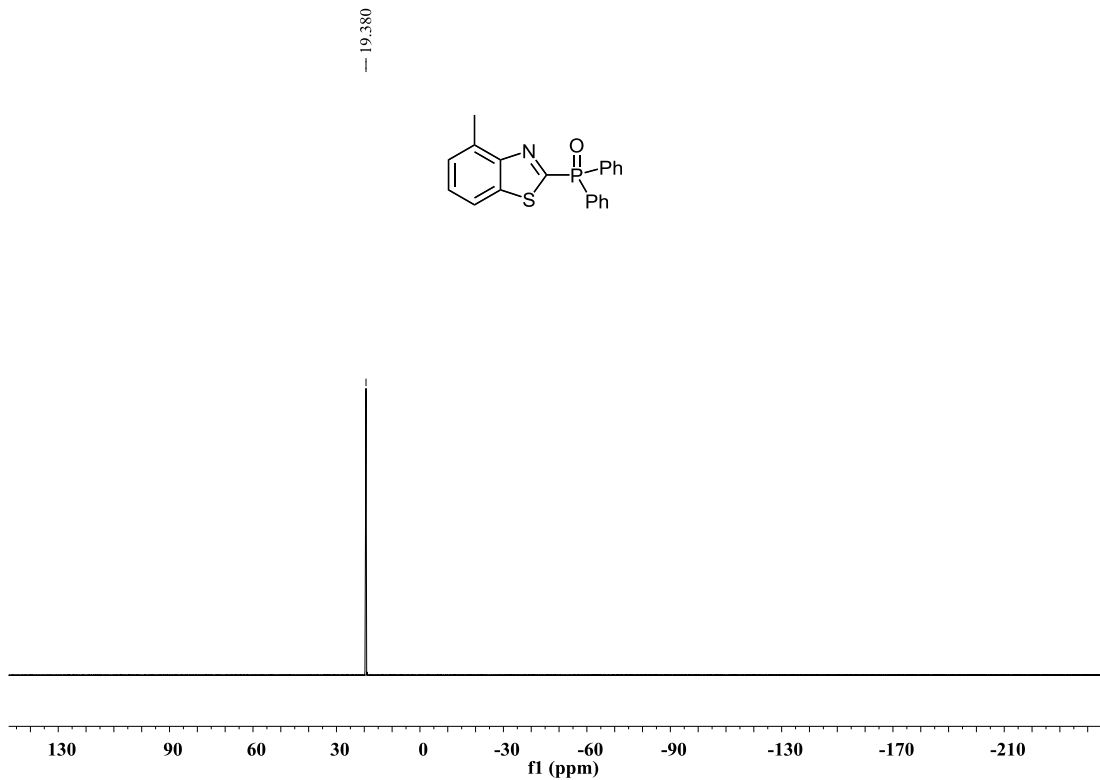

**3ea**

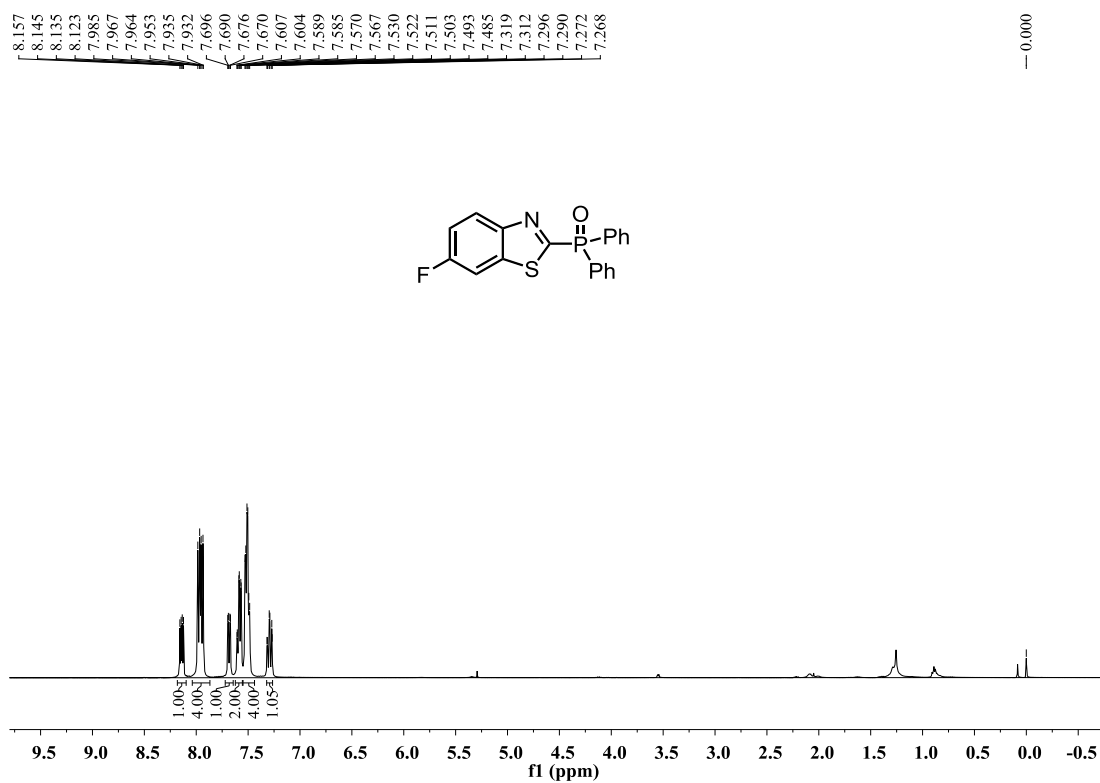

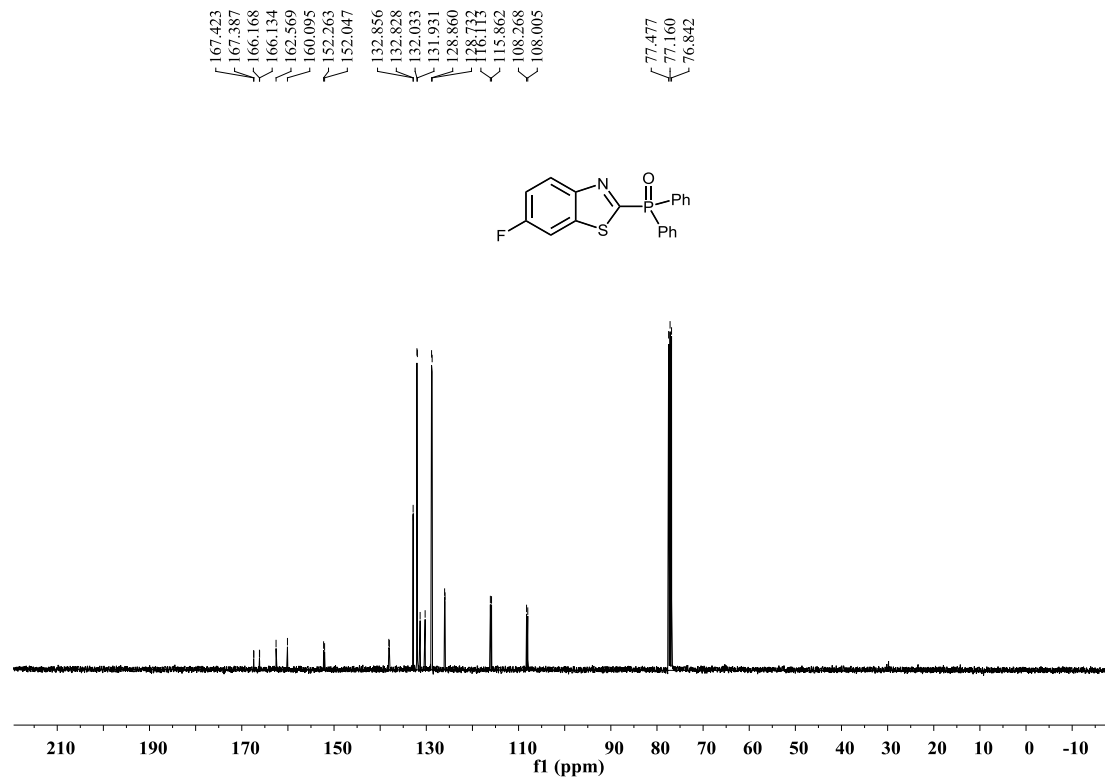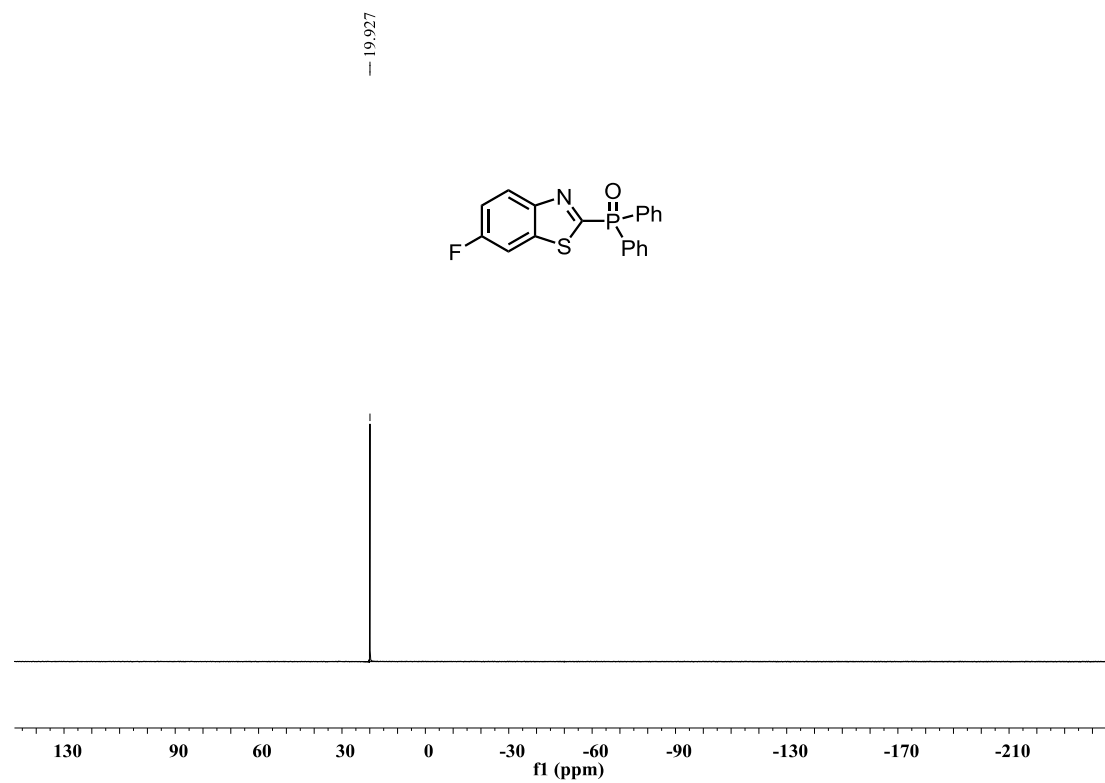

3fa

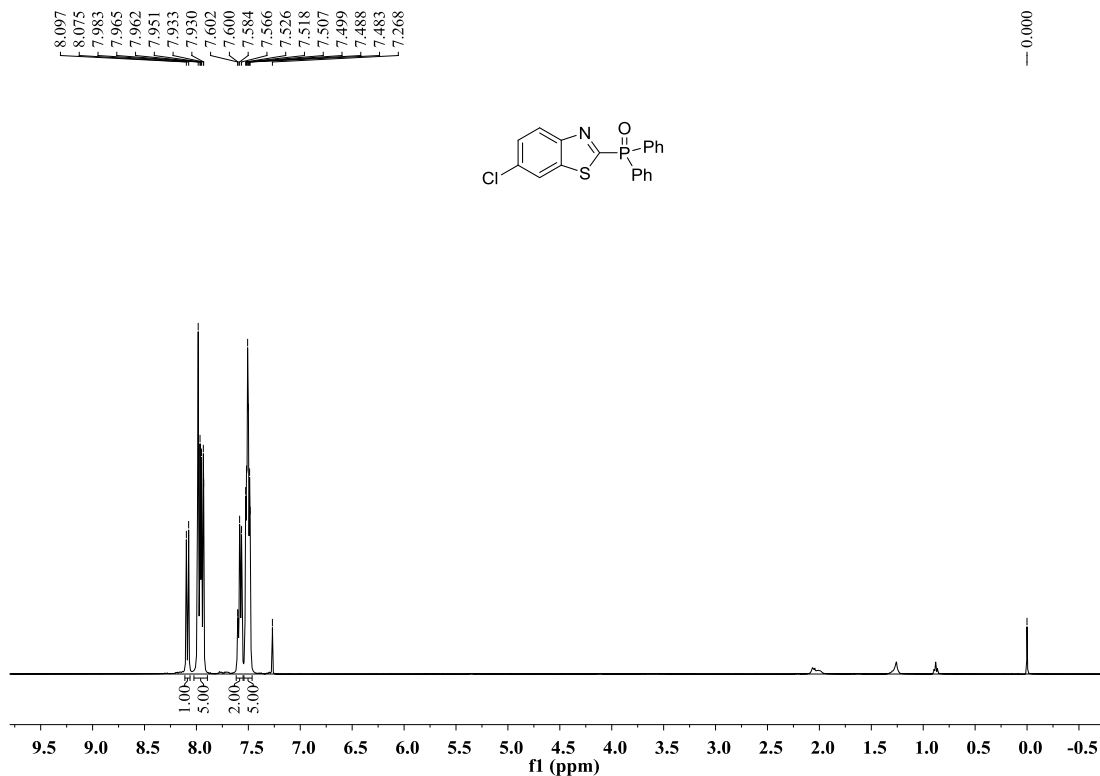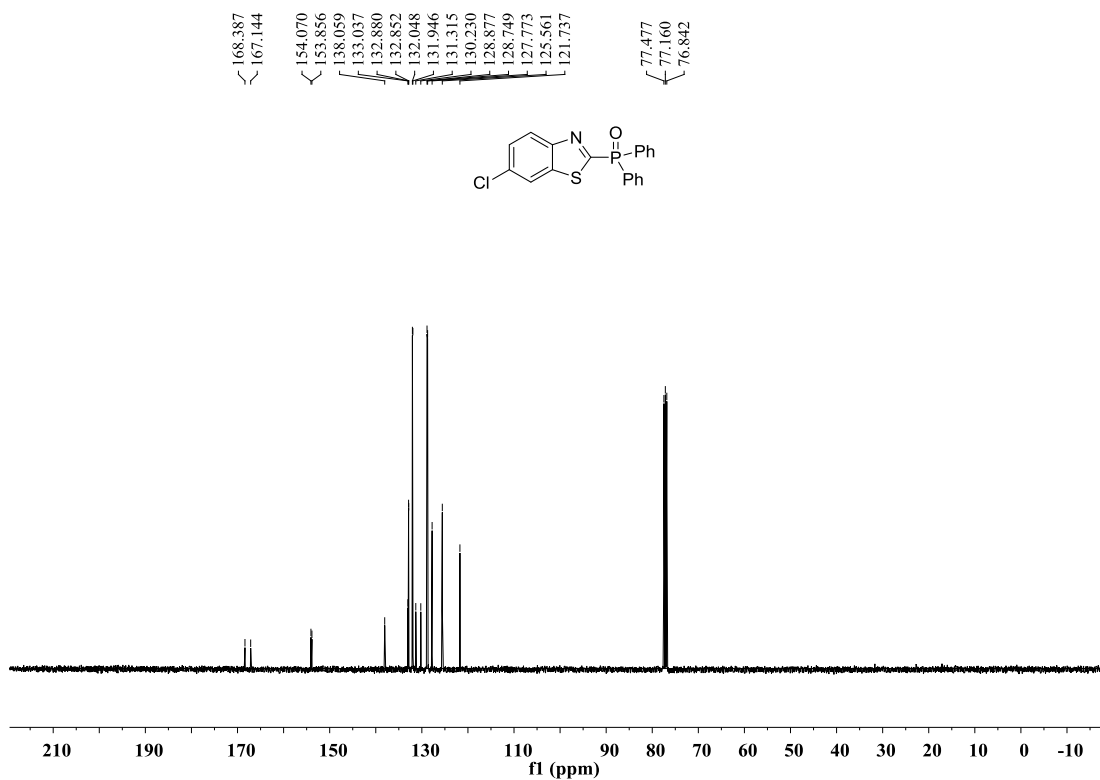

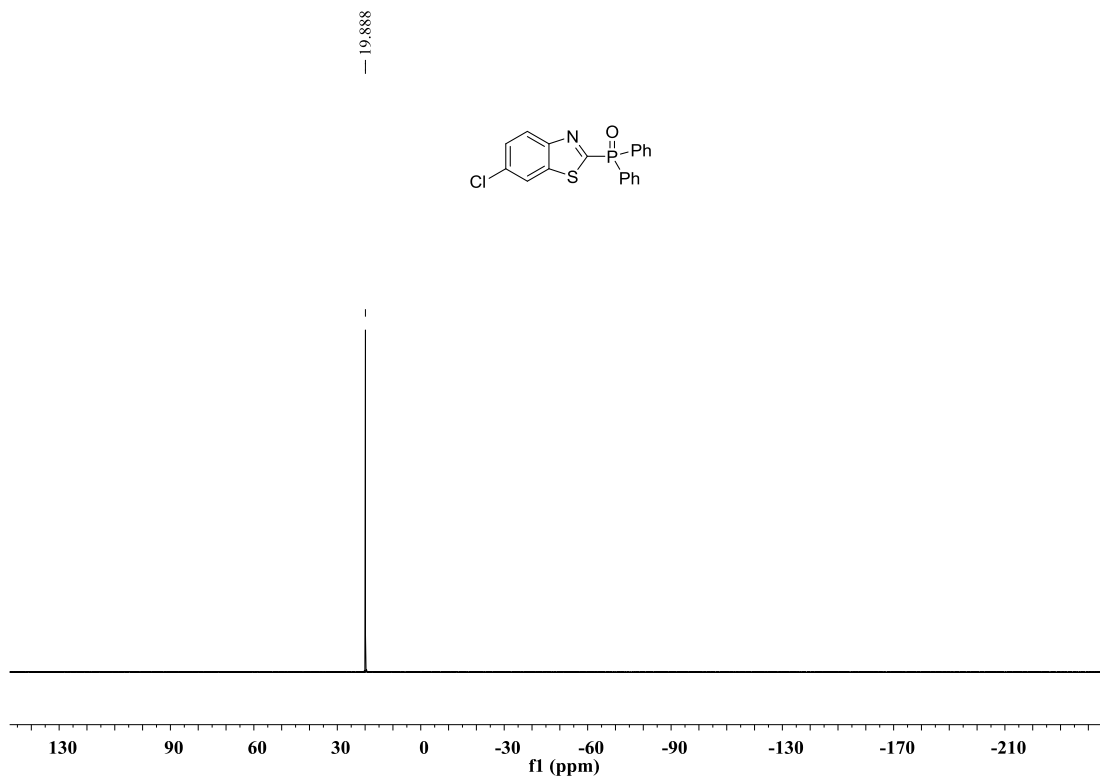

3ga

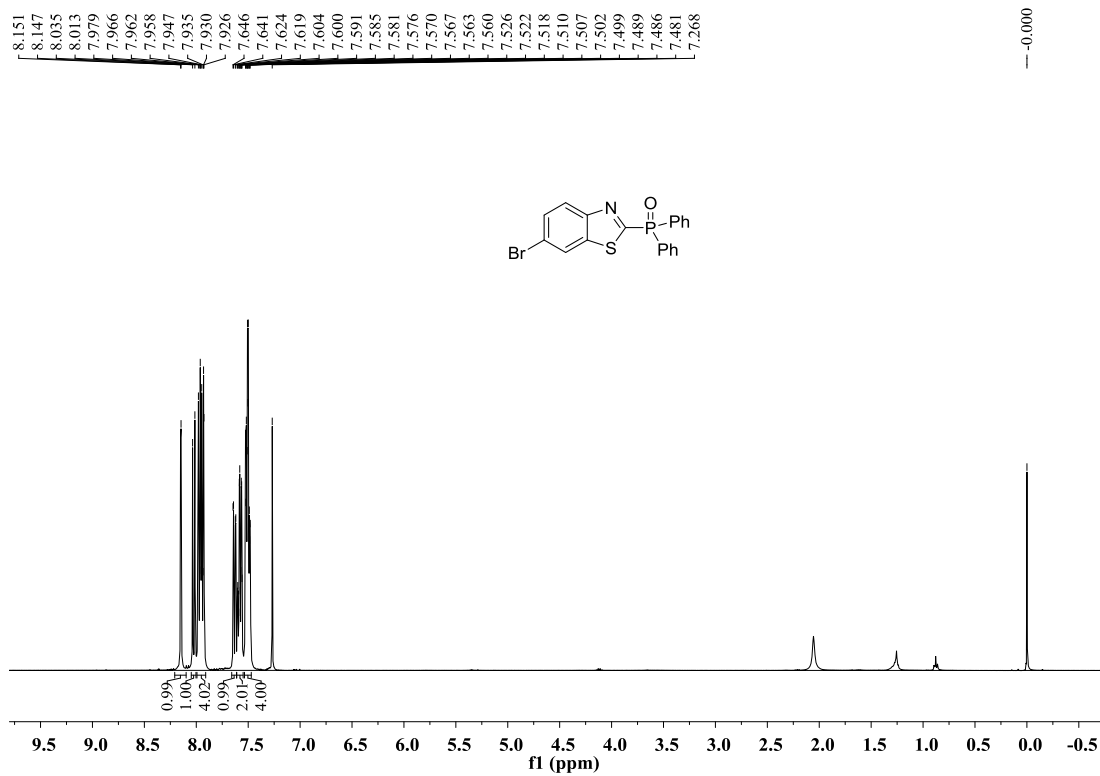

168.387  
167.146  
154.354  
154.141  
138.478  
132.899  
132.871  
132.040  
131.938  
131.233  
130.433  
130.148  
128.884  
128.756  
125.854  
124.716  
120.879  
77.478  
77.160  
76.843

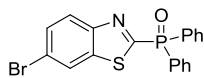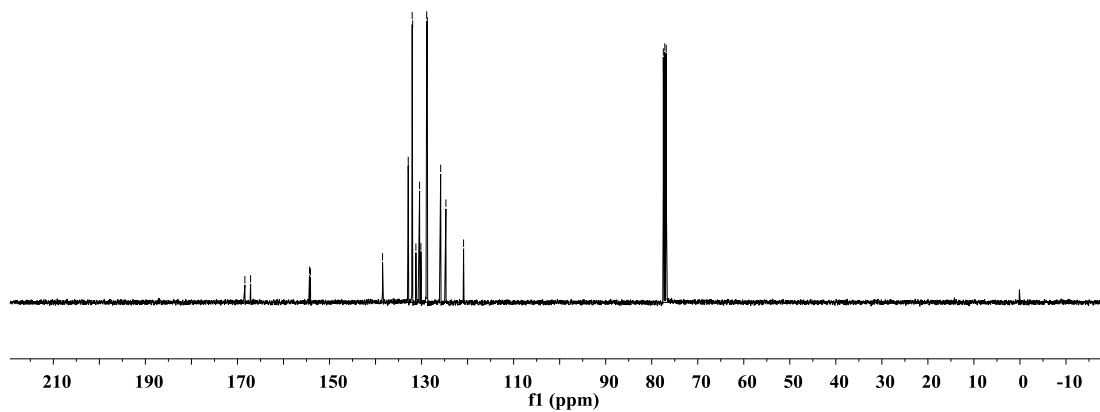

19.975

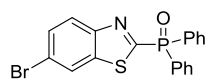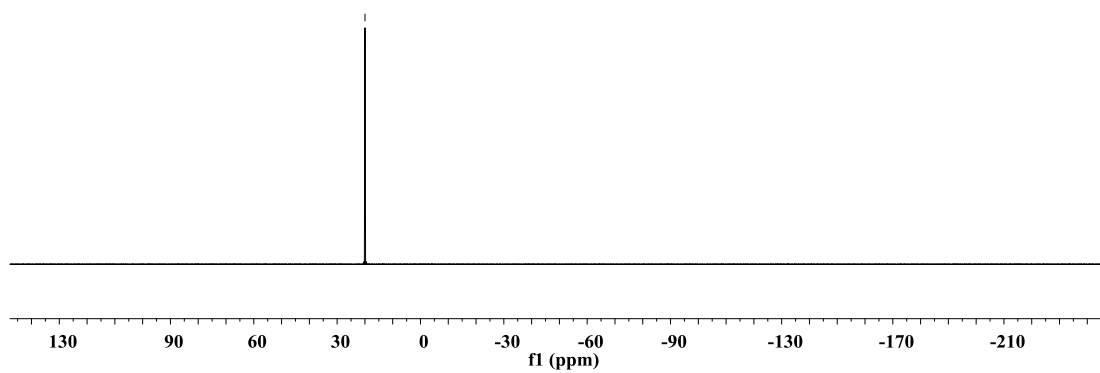

3ha

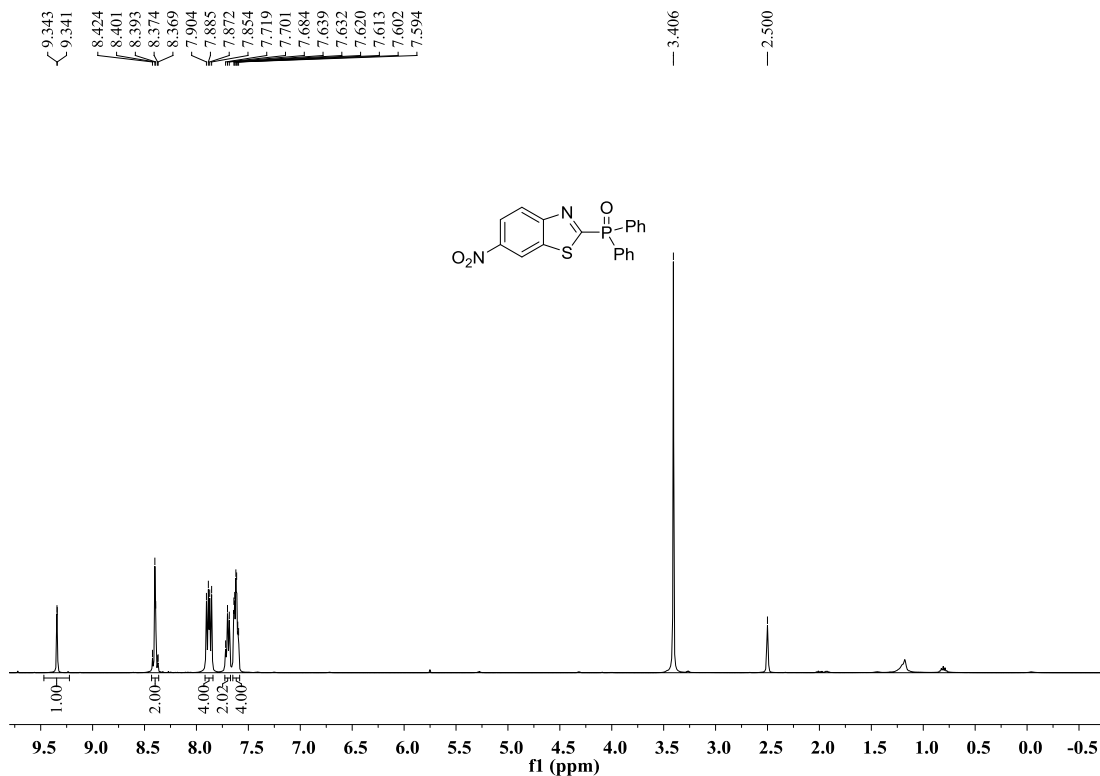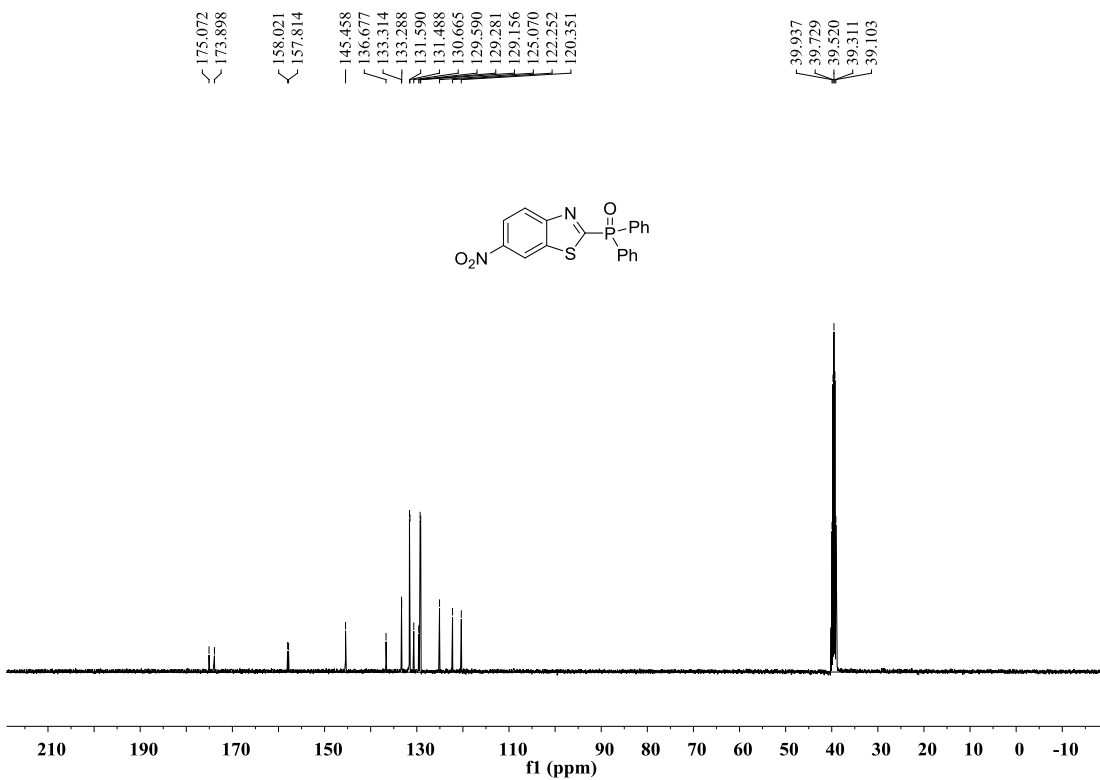

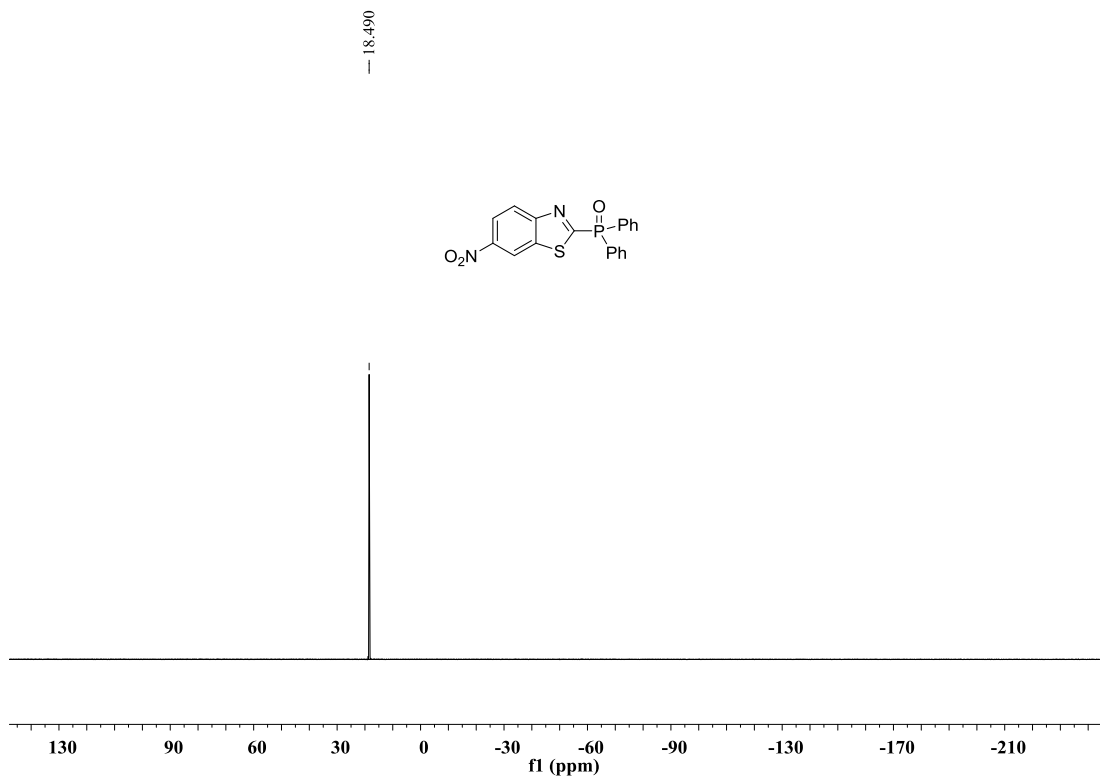

**3ab**

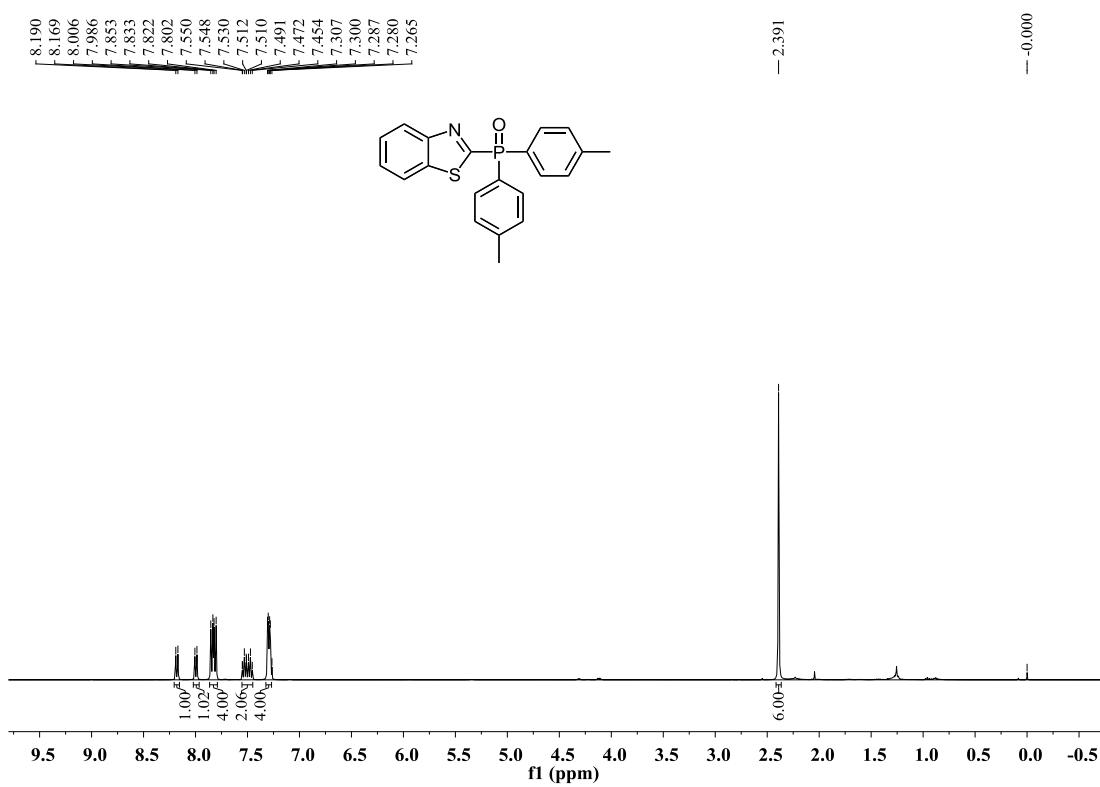

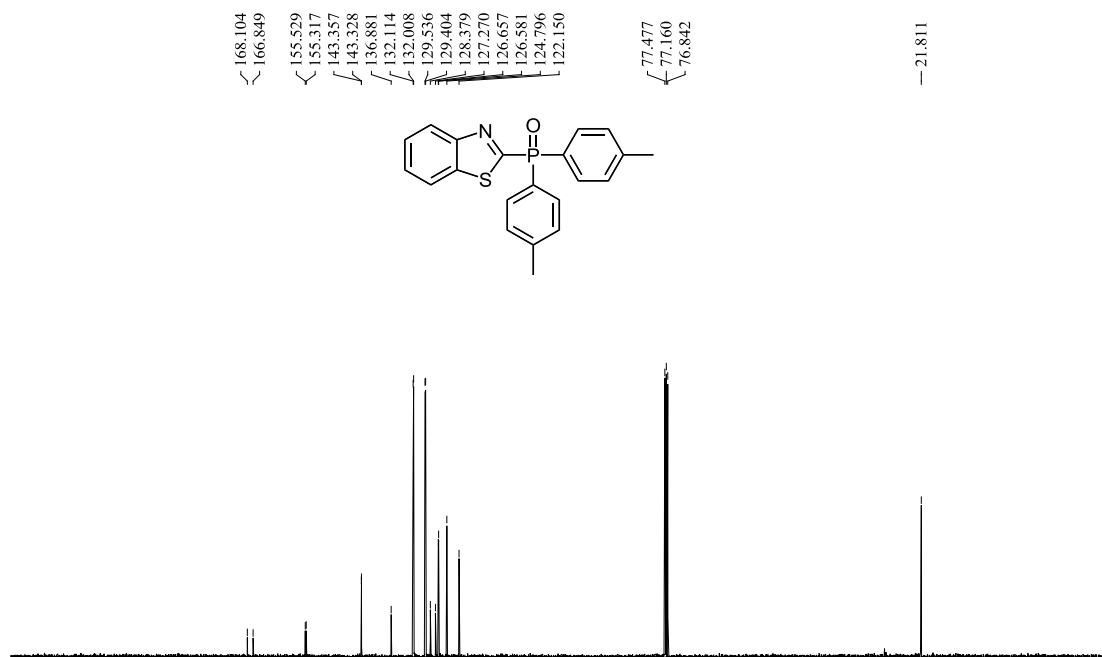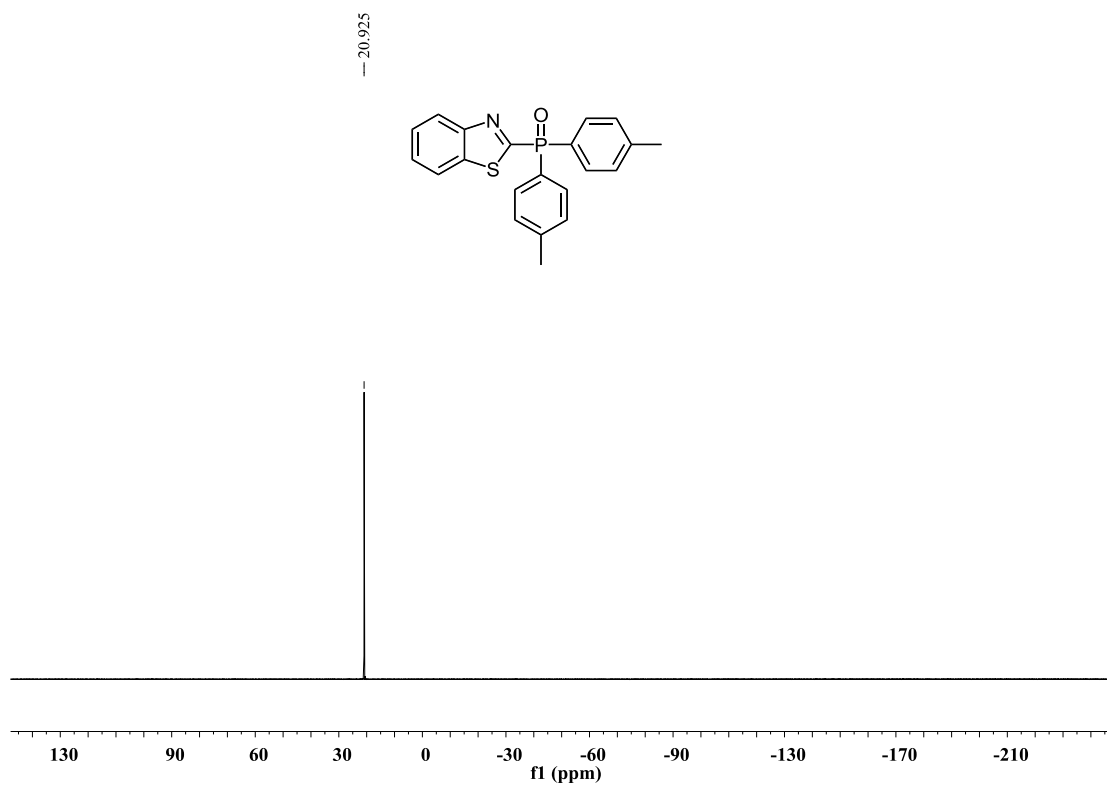

3ac



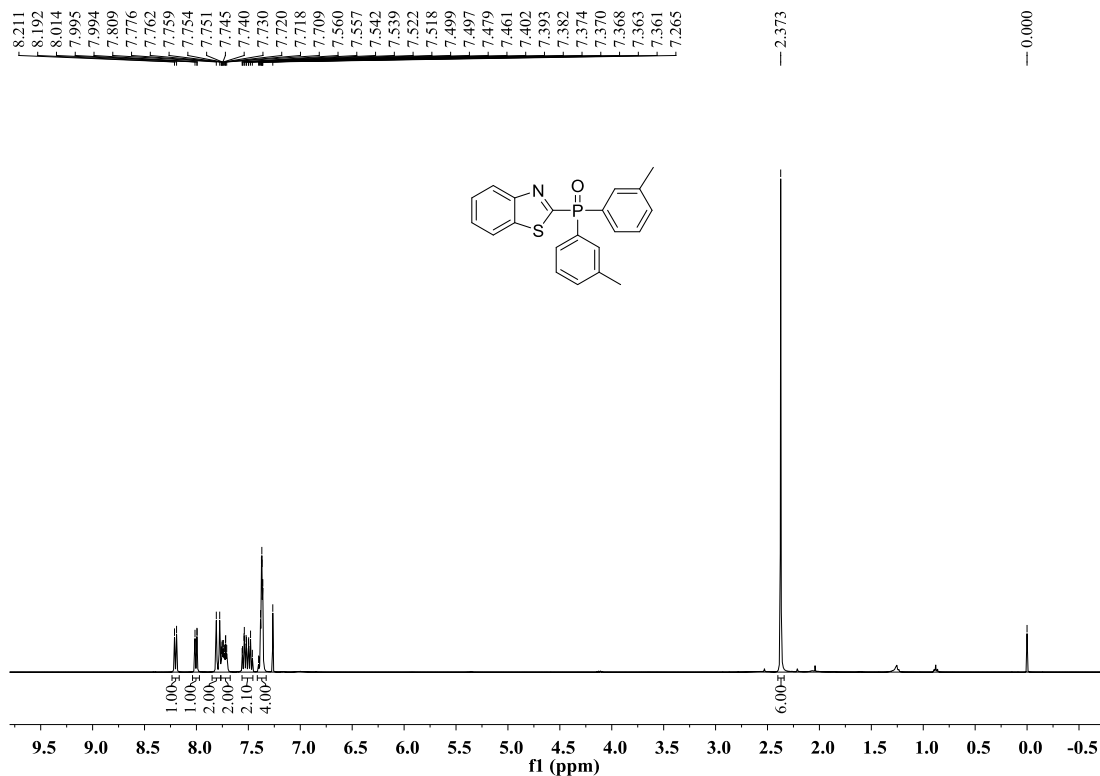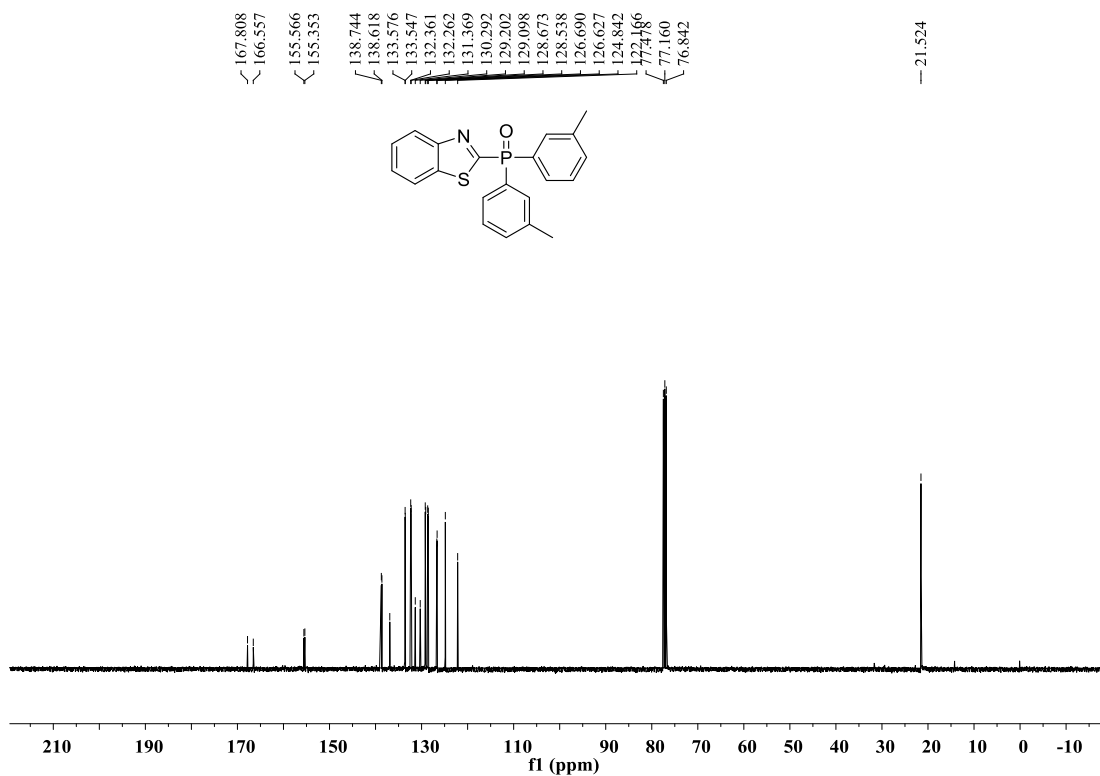

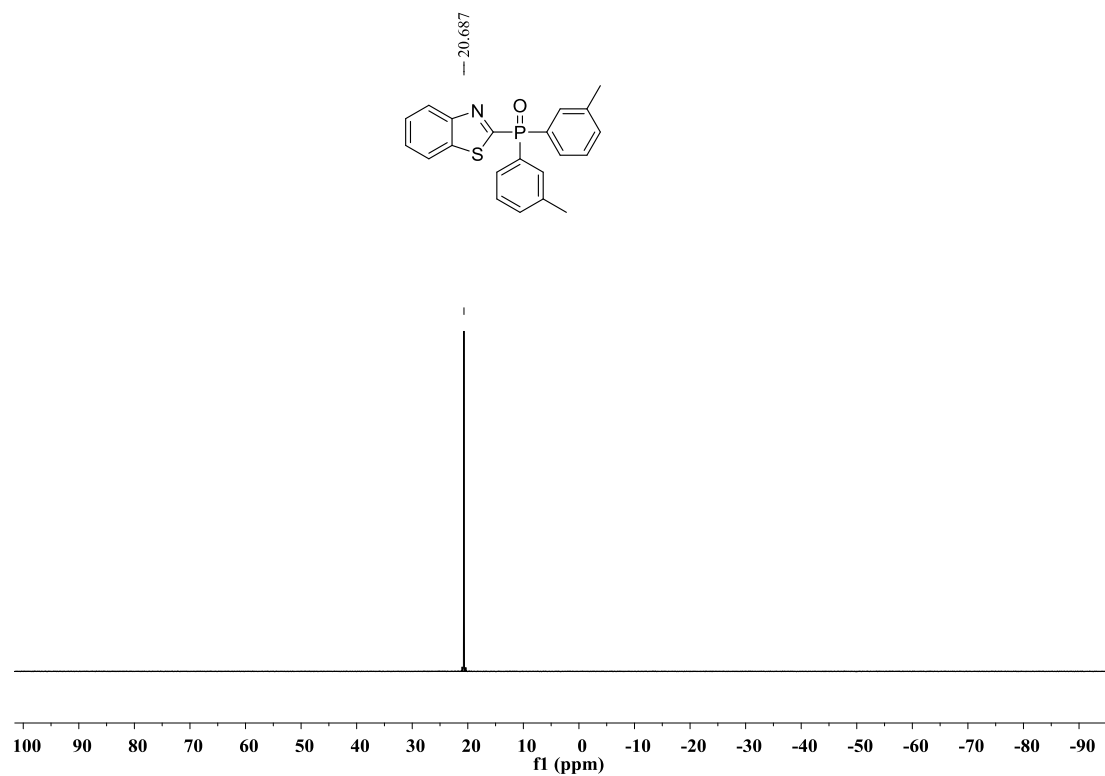

**3ad**

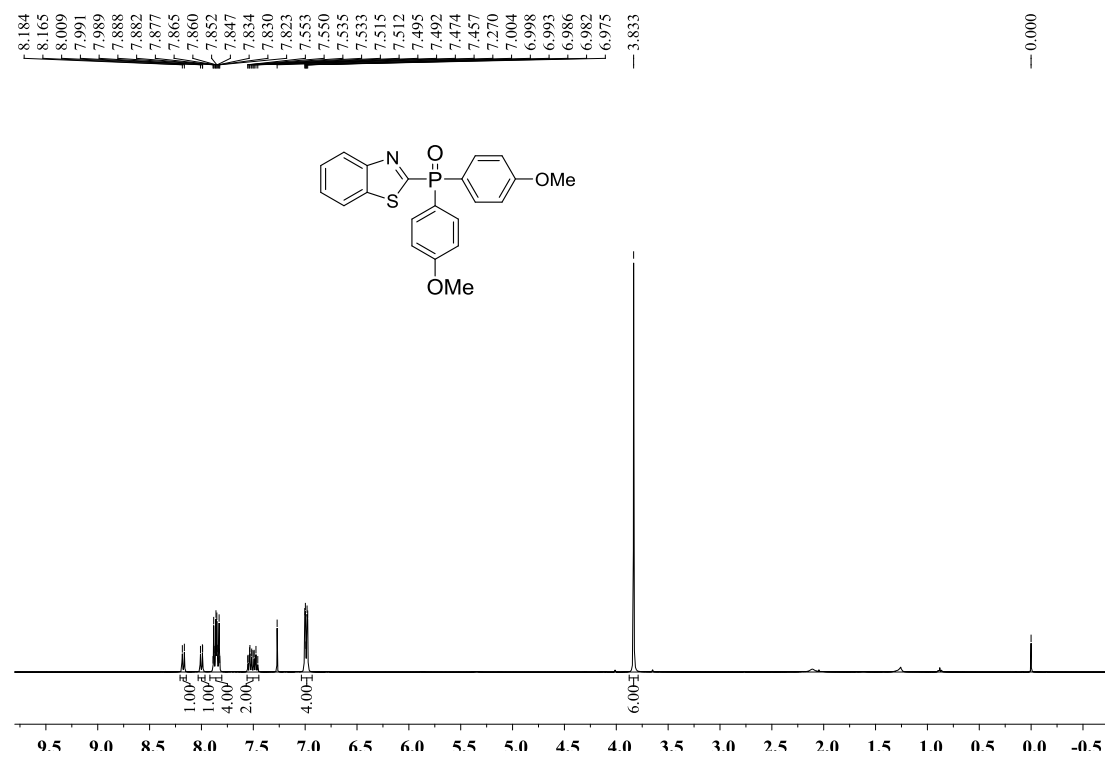

168.537  
167.276  
163.101  
163.073  
155.541  
155.329  
136.894  
134.080  
133.964  
126.658  
126.558  
124.756  
122.886  
122.166  
121.730  
114.399  
114.261

77.478  
77.160  
76.842

55.481

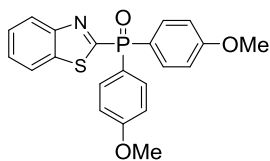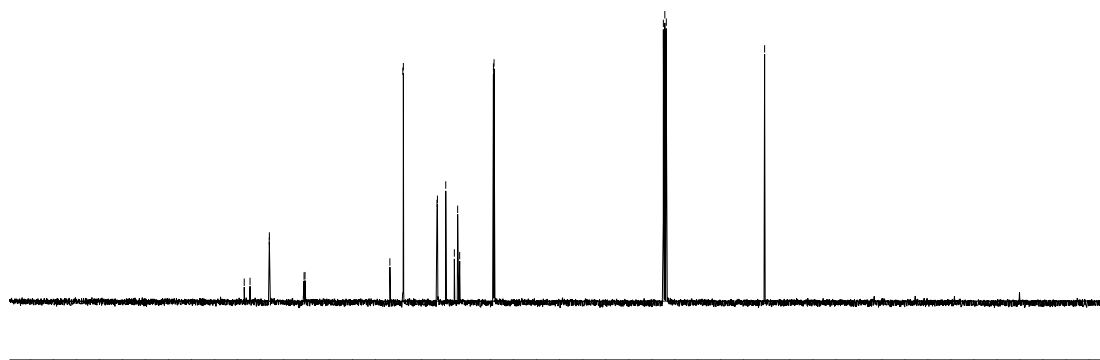

20.738

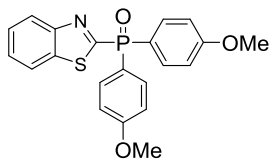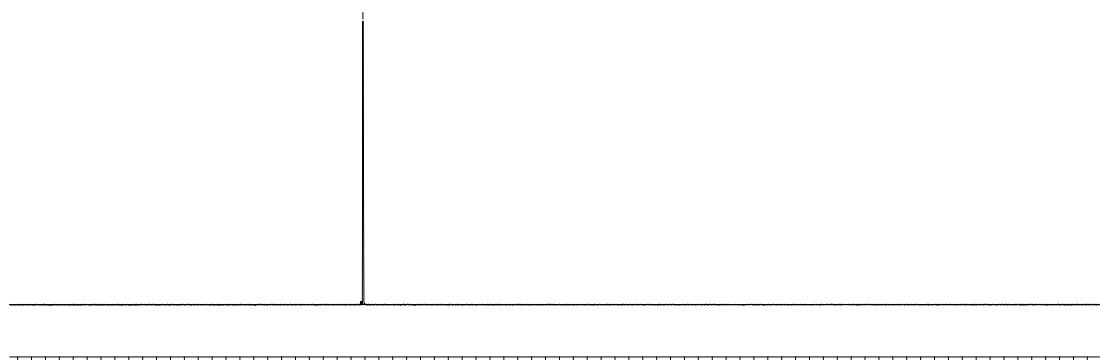

3ae

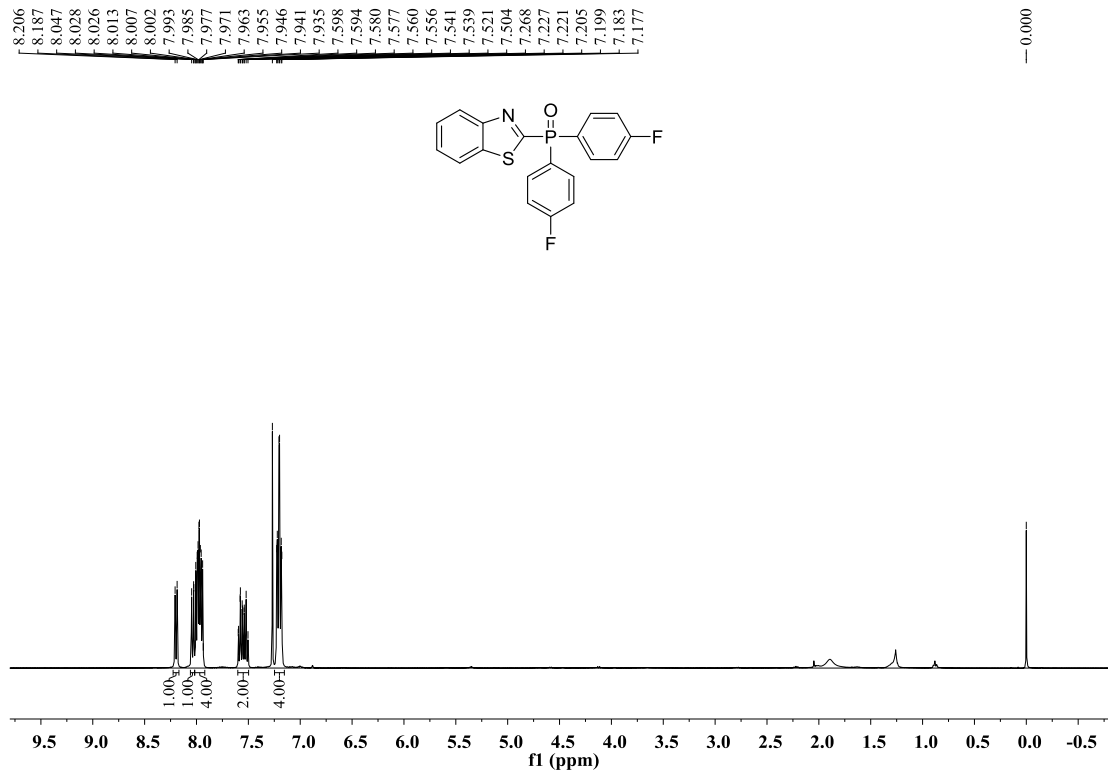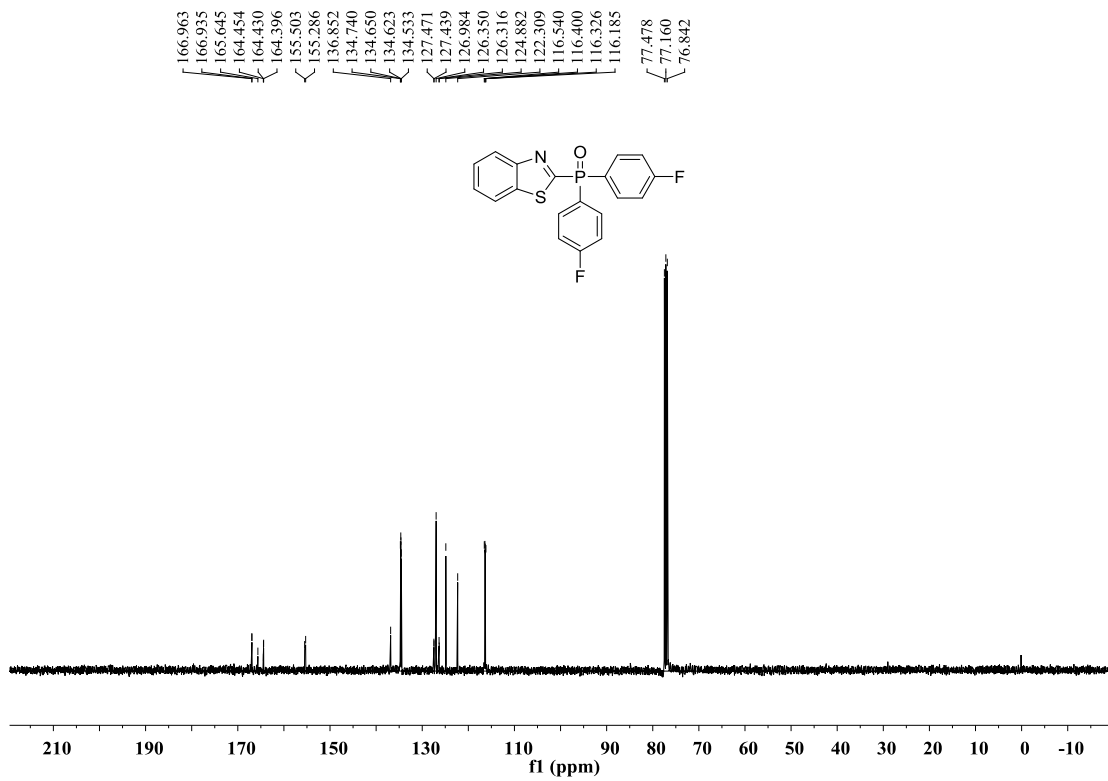

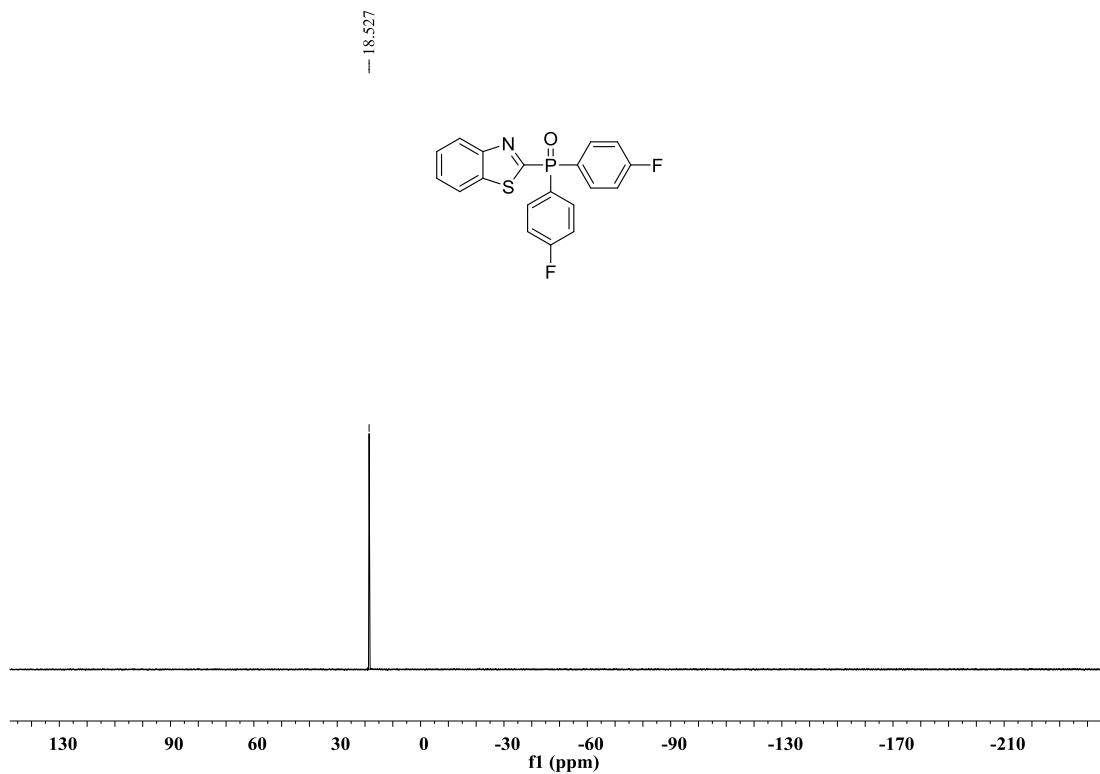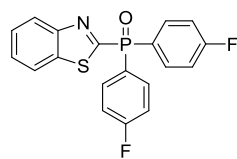

3af

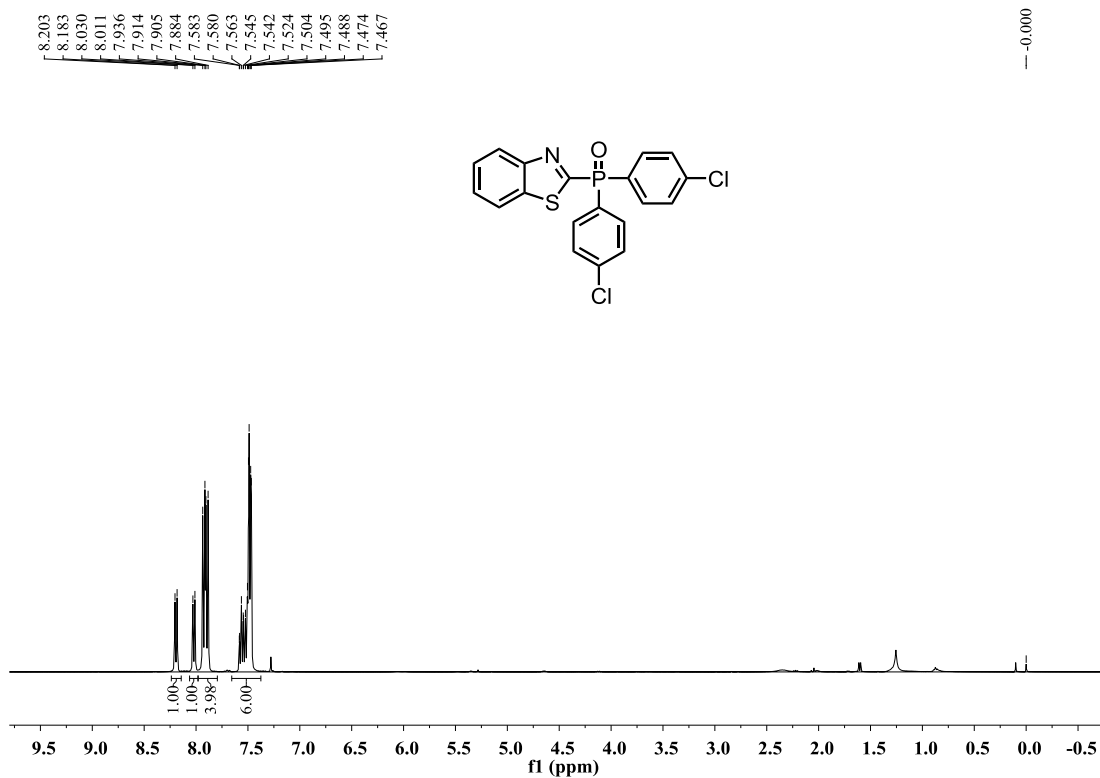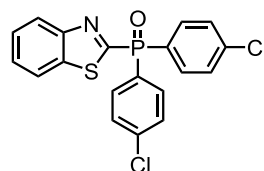

166.287  
 164.989  
 155.376  
 155.157  
 139.658  
 139.623  
 136.728  
 133.528  
 133.218  
 129.711  
 129.272  
 129.138  
 128.607  
 126.970  
 124.812  
 122.229  
 77.477  
 77.160  
 76.842

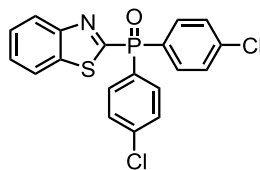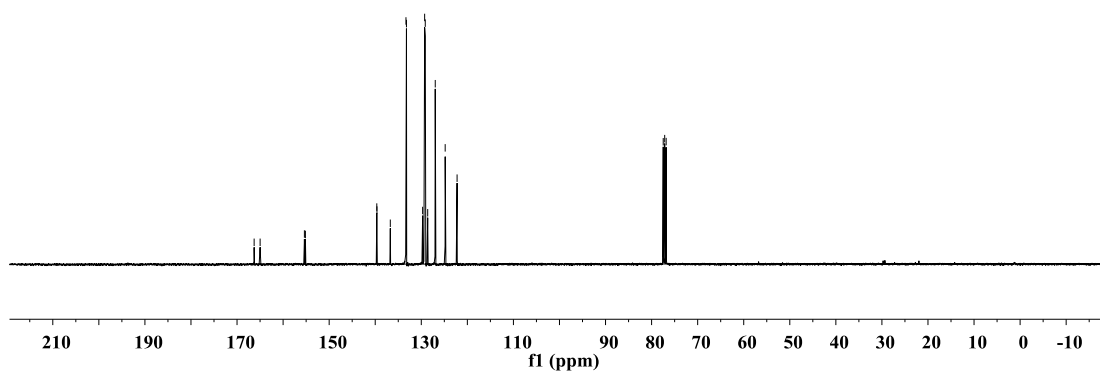

18.357

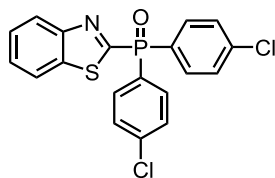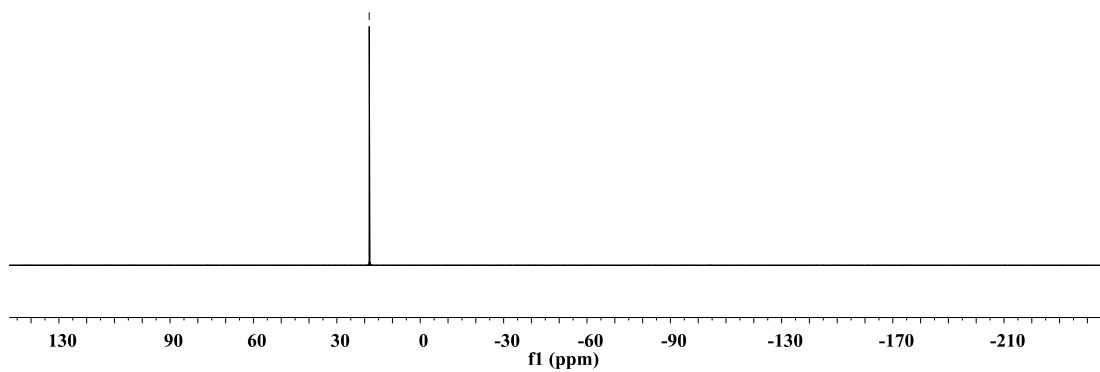

3ah

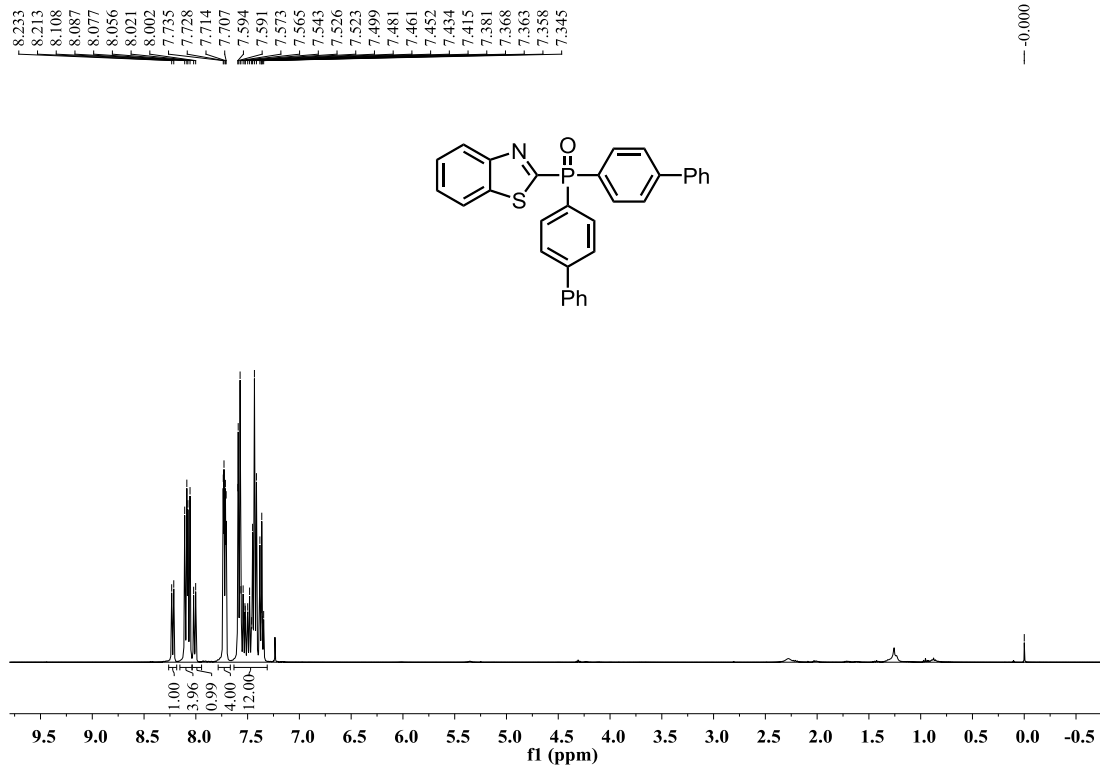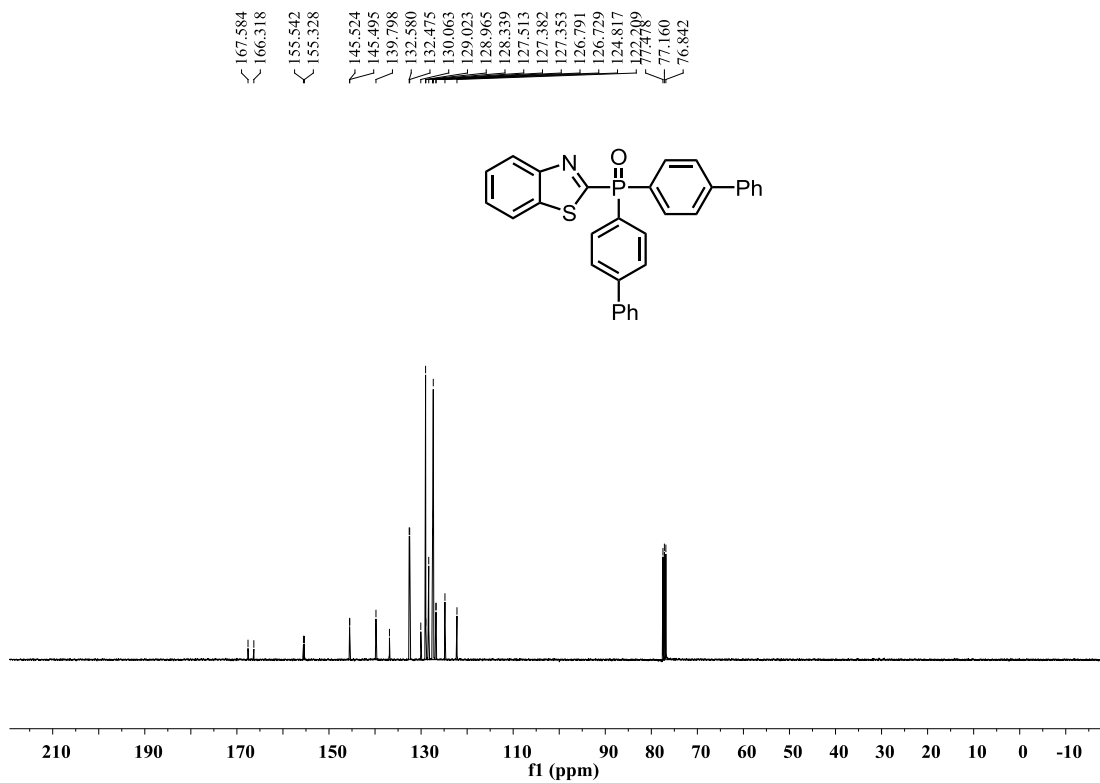

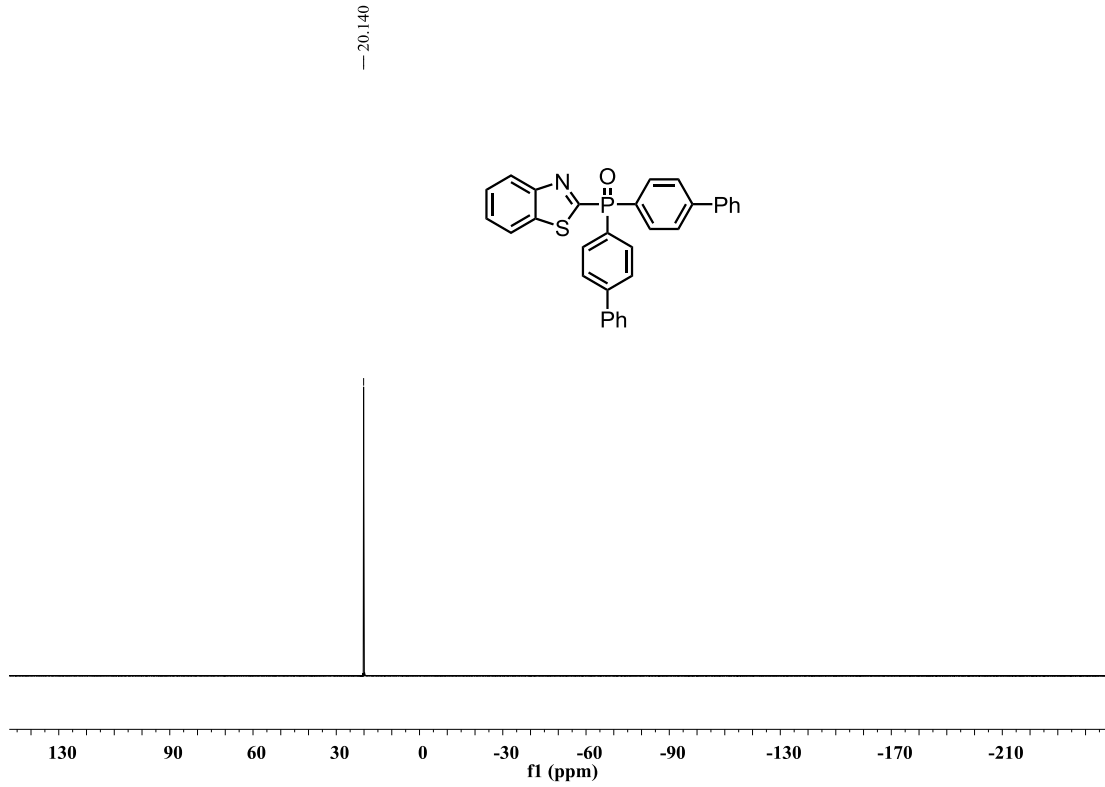

3ai

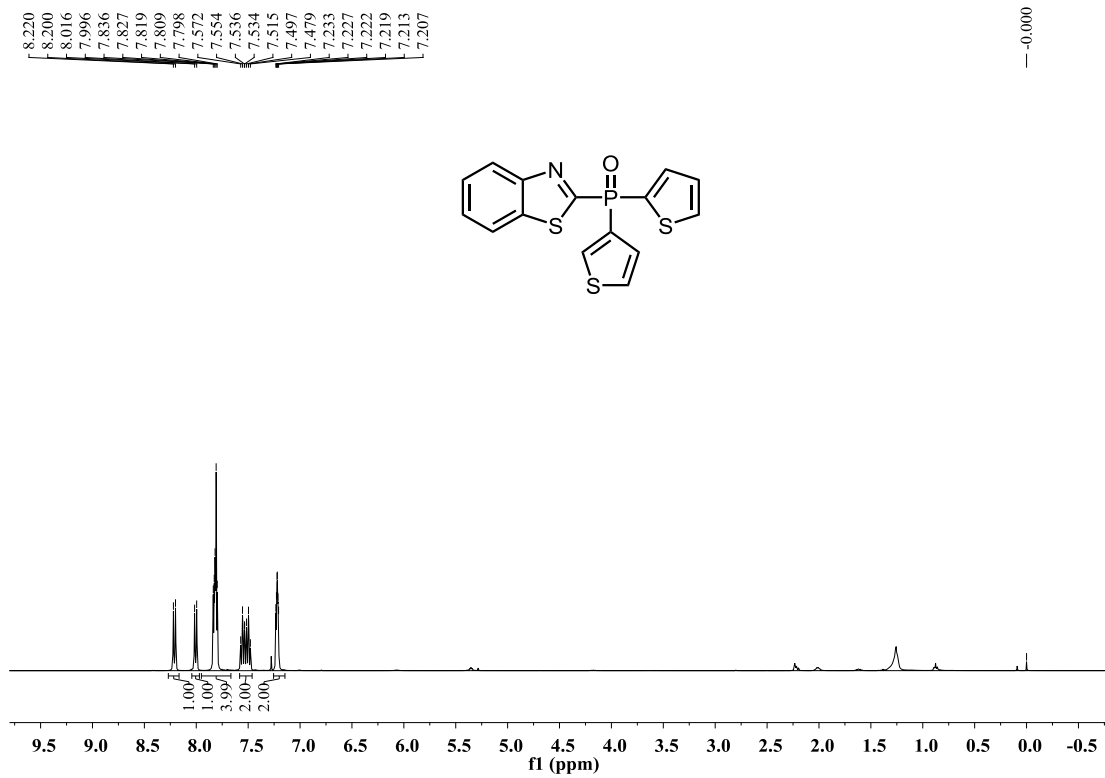



166.956  
165.494  
155.150  
154.910  
137.812  
137.700  
136.838  
135.398  
135.340  
132.325  
131.048  
128.606  
128.452  
126.951  
124.892  
122.200  
77.478  
77.160  
76.842

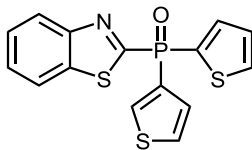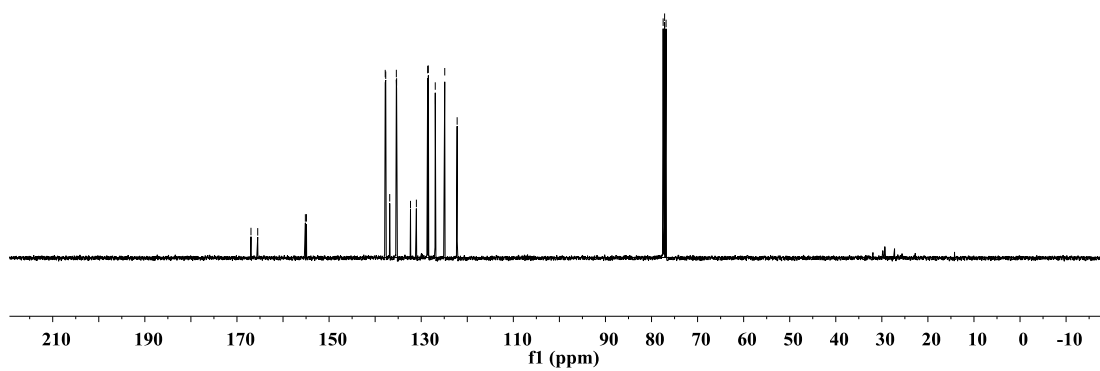

-0.953

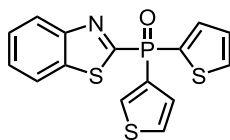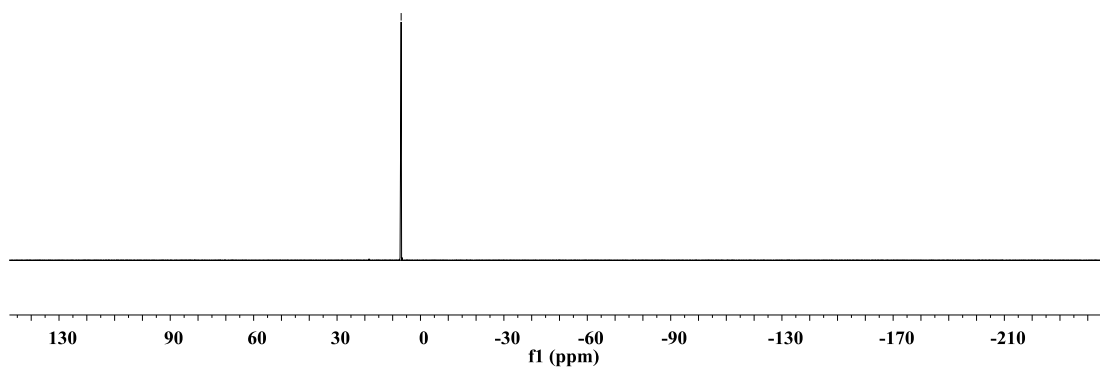

Supplement: c6qo00049e1.pdf [file c6qo00049e1.pdf]
